# Supplementary material
Source: PubMed Central journal article supplement (PMC4506855)
Supplement: NIHMS666397-supplement-592_2015_720_MOESM1_ESM.pdf [file NIHMS666397-supplement-592_2015_720_MOESM1_ESM.pdf]

Supplementary Table 1: SNPs included in genetic risk scores. Abbreviations: GWAS, genome-wide association study array; Exome, exome array; MAF, minor allele frequency in the Diabetes Heart Study; HWE, Hardy Weinberg Equilibrium p-value in unrelated individuals from the Diabetes Heart Study; M/m, Major allele/minor allele; CAC, coronary artery calcification; CAD, coronary artery disease; CRP, C-reactive protein; eGFR, estimated glomerular filtration rate.

| Chr | Position  | SNP        | Gene      | Source    | Risk Score            | Alleles (M/m) | Risk Allele | MAF  | HWE  | Reference |
|-----|-----------|------------|-----------|-----------|-----------------------|---------------|-------------|------|------|-----------|
| 1   | 11862778  | rs17367504 | MTHFR     | Exome     | Blood pressure traits | A/G           | A           | 0.18 | 0.64 | 1         |
| 3   | 27537909  | rs13082711 | SLC4A7    | Genotyped | Blood pressure traits | T/C           | C           | 0.22 | 0.90 | 1         |
| 3   | 47927484  | rs319690   | MAP4      | Imputed   | Blood pressure traits | T/C           | T           | 0.31 | 0.31 | 1         |
| 3   | 169100886 | rs419076   | MECOM     | Imputed   | Blood pressure traits | T/C           | T           | 0.49 | 0.02 | 1         |
| 4   | 54799245  | rs871606   | CHIC2     | Imputed   | Blood pressure traits | T/C           | T           | 0.08 | 0.73 | 1         |
| 4   | 81164723  | rs1458038  | FGF5      | Genotyped | Blood pressure traits | G/A           | A           | 0.30 | 1.00 | 1         |
| 4   | 103188709 | rs13107325 | SLC39A8   | Exome     | Blood pressure traits | G/A           | G           | 0.08 | 0.34 | 1         |
| 5   | 32815028  | rs1173771  | NPR3      | Genotyped | Blood pressure traits | C/T           | C           | 0.38 | 0.22 | 1         |
| 5   | 157804457 | rs9313772  | EBF1      | GWAS      | Blood pressure traits | C/T           | C           | 0.38 | 1.00 | 1         |
| 6   | 26107463  | rs198846   | HFE       | Exome     | Blood pressure traits | G/A           | A           | 0.18 | 0.04 | 1         |
| 7   | 106411858 | rs17477177 | PIK3CG    | Imputed   | Blood pressure traits | T/C           | C           | 0.21 | 0.88 | 1         |
| 8   | 120435812 | rs2071518  | NOV       | Imputed   | Blood pressure traits | C/T           | T           | 0.27 | 0.06 | 1         |
| 10  | 18727959  | rs12258967 | CACNB2    | Genotyped | Blood pressure traits | C/G           | C           | 0.30 | 0.12 | 1         |
| 10  | 63467553  | rs4590817  | C10orf107 | Imputed   | Blood pressure traits | G/C           | G           | 0.15 | 0.35 | 1         |
| 10  | 95895177  | rs9663362  | PLCE1     | GWAS      | Blood pressure traits | G/C           | C           | 0.46 | 0.85 | 1         |
| 10  | 104846178 | rs11191548 | NT5C2     | Exome     | Blood pressure traits | A/G           | A           | 0.08 | 0.55 | 1         |
| 11  | 16902268  | rs381815   | PLEKHA7   | Imputed   | Blood pressure traits | C/T           | T           | 0.28 | 1.00 | 1         |
| 11  | 130273230 | rs11222084 | ADAMTS8   | GWAS      | Blood pressure traits | A/T           | T           | 0.35 | 0.19 | 1         |
| 12  | 90060586  | rs17249754 | ATP2B1    | Exome     | Blood pressure traits | G/A           | G           | 0.18 | 1.00 | 1         |
| 12  | 112007756 | rs653178   | ATXN2     | Exome     | Blood pressure traits | A/G           | G           | 0.50 | 0.31 | 1         |
| 15  | 75077367  | rs1378942  | CSK       | Exome     | Blood pressure traits | A/C           | C           | 0.32 | 0.11 | 1         |
| 17  | 45013271  | rs17608766 | GOSR2     | Exome     | Blood pressure traits | A/G           | G           | 0.15 | 1.00 | 1         |
| 20  | 10969030  | rs1327235  | JAG1      | GWAS      | Blood pressure traits | A/G           | G           | 0.48 | 1.00 | 1         |
| 20  | 57751117  | rs6015450  | ZNF831    | Genotyped | Blood pressure traits | A/G           | G           | 0.12 | 0.09 | 1         |
| 1   | 72812440  | rs2815752  | NEGR1     | Exome     | BMI                   | A/G           | A           | 0.38 | 0.38 | 2         |
| 1   | 74991644  | rs1514175  | TNNI3K    | Exome     | BMI                   | G/A           | A           | 0.42 | 0.63 | 2         |
| 1   | 96944797  | rs1555543  | PTBP2     | Exome     | BMI                   | C/A           | C           | 0.40 | 0.01 | 2         |

|    |           |            |         |         |     |     |   |      |      |   |
|----|-----------|------------|---------|---------|-----|-----|---|------|------|---|
| 1  | 177889480 | rs543874   | SEC16B  | Exome   | BMI | A/G | G | 0.20 | 0.89 | 2 |
| 2  | 622827    | rs2867125  | TMEM18  | Exome   | BMI | G/A | G | 0.15 | 0.71 | 2 |
| 2  | 25158008  | rs713586   | ADCY3   | Exome   | BMI | A/G | G | 0.49 | 0.64 | 2 |
| 2  | 59302877  | rs887912   | FANCL   | Exome   | BMI | G/A | A | 0.30 | 0.19 | 2 |
| 2  | 142959931 | rs2890652  | LRP1B   | Imputed | BMI | T/C | C | 0.17 | 0.48 | 2 |
| 3  | 85884150  | rs13078807 | CADM2   | Exome   | BMI | A/G | G | 0.21 | 0.33 | 2 |
| 3  | 185834499 | rs9816226  | ETV5    | Exome   | BMI | A/T | A | 0.20 | 0.30 | 2 |
| 4  | 45182527  | rs10938397 | GNPDA2  | Exome   | BMI | A/G | G | 0.44 | 0.26 | 2 |
| 4  | 103188709 | rs13107325 | SLC39A8 | Exome   | BMI | G/A | A | 0.08 | 0.34 | 2 |
| 5  | 75015242  | rs2112347  | HMGCR   | Exome   | BMI | A/C | A | 0.36 | 0.84 | 2 |
| 6  | 34302869  | rs206936   | NUDT3   | Exome   | BMI | A/G | G | 0.21 | 1.00 | 2 |
| 6  | 50803050  | rs987237   | TFAP2B  | Exome   | BMI | A/G | G | 0.18 | 0.11 | 2 |
| 9  | 28414339  | rs10968576 | LRRN6C  | Exome   | BMI | A/G | G | 0.31 | 0.74 | 2 |
| 11 | 8604593   | rs4929949  | STK33   | Exome   | BMI | G/A | G | 0.46 | 0.51 | 2 |
| 11 | 27725986  | rs10767664 | BDNF    | Exome   | BMI | A/T | A | 0.20 | 0.89 | 2 |
| 11 | 47650993  | rs3817334  | MTCH2   | Exome   | BMI | G/A | A | 0.43 | 0.15 | 2 |
| 12 | 50247468  | rs7138803  | FAIM2   | Exome   | BMI | G/A | A | 0.37 | 0.37 | 2 |
| 13 | 28020180  | rs4771122  | MTIF3   | Exome   | BMI | A/G | G | 0.23 | 0.69 | 2 |
| 14 | 30515112  | rs11847697 | PRKD1   | Exome   | BMI | G/A | A | 0.05 | 0.61 | 2 |
| 14 | 79936964  | rs10150332 | NRXN3   | Imputed | BMI | T/C | C | 0.23 | 0.60 | 2 |
| 15 | 68086838  | rs2241423  | MAP2K5  | Exome   | BMI | G/A | G | 0.23 | 0.11 | 2 |
| 16 | 19933600  | rs12444979 | GPRC5B  | Exome   | BMI | G/A | G | 0.16 | 0.86 | 2 |
| 16 | 28885659  | rs7359397  | SH2B1   | Exome   | BMI | G/A | A | 0.42 | 0.70 | 2 |
| 16 | 53803574  | rs1558902  | FTO     | Exome   | BMI | A/T | T | 0.45 | 0.19 | 2 |
| 18 | 57839769  | rs571312   | MC4R    | Exome   | BMI | C/A | A | 0.23 | 1.00 | 2 |
| 19 | 34309532  | rs29941    | KCTD15  | Exome   | BMI | G/A | G | 0.31 | 0.83 | 2 |
| 19 | 46202172  | rs2287019  | QPCTL   | Exome   | BMI | G/A | G | 0.19 | 0.17 | 2 |
| 19 | 47569003  | rs3810291  | ZC3H4   | Exome   | BMI | A/G | A | 0.32 | 1.00 | 2 |
| 6  | 12903957  | rs9349379  | PHACTR1 | Exome   | CAC | A/G | G | 0.36 | 0.84 | 3 |
| 9  | 22125503  | rs1333049  | CDKN2B  | Exome   | CAC | C/G | G | 0.47 | 0.46 | 3 |
| 1  | 55496039  | rs11206510 | PCSK9   | Exome   | CAD | A/G | A | 0.22 | 1.00 | 4 |
| 1  | 56962821  | rs17114036 | PPAP2B  | Exome   | CAD | A/G | A | 0.07 | 1.00 | 4 |
| 1  | 222823529 | rs17465637 | MIA3    | GWAS    | CAD | C/A | C | 0.28 | 0.82 | 4 |

|    |            |            |          |           |     |     |   |      |      |    |
|----|------------|------------|----------|-----------|-----|-----|---|------|------|----|
| 1  | 1098822166 | rs599839   | SORT1    | Exome     | CAD | A/G | A | 0.24 | 0.53 | 4  |
| 2  | 203745885  | rs6725887  | WDR12    | GWAS      | CAD | T/C | C | 0.14 | 0.43 | 4  |
| 3  | 138122122  | rs9818870  | MRAS     | GWAS      | CAD | C/T | T | 0.17 | 0.73 | 5  |
| 6  | 12927544   | rs12526453 | PHACTR1  | GWAS      | CAD | C/G | C | 0.35 | 1.00 | 4  |
| 6  | 31184196   | rs3869109  | HCG27    | Exome     | CAD | G/A | G | 0.42 | 0.50 | 6  |
| 6  | 35034800   | rs17609940 | ANKS1A   | GWAS      | CAD | G/C | G | 0.20 | 1.00 | 4  |
| 6  | 151252985  | rs6922269  | MTHFD1L  | GWAS      | CAD | G/A | A | 0.29 | 0.03 | 7  |
| 6  | 160961137  | rs3798220  | LPA      | Exome     | CAD | A/G | G | 0.02 | 1.00 | 4  |
| 7  | 107244545  | rs10953541 | BCAP29   | Exome     | CAD | G/A | G | 0.23 | 0.44 | 8  |
| 7  | 129663496  | rs11556924 | ZC3HC1   | GWAS      | CAD | C/T | C | 0.39 | 0.33 | 4  |
| 9  | 22031005   | rs7865618  | MTAP     | Exome     | CAD | A/G | A | 0.43 | 1.00 | 9  |
| 9  | 136154168  | rs579459   | ABO      | Exome     | CAD | A/G | G | 0.22 | 0.28 | 4  |
| 10 | 30335122   | rs2505083  | KIAA1462 | Exome     | CAD | A/G | G | 0.42 | 0.63 | 8  |
| 10 | 44775824   | rs1746048  | CXCL12   | GWAS      | CAD | C/T | C | 0.12 | 0.66 | 4  |
| 10 | 91002927   | rs1412444  | LIPA     | Genotyped | CAD | G/A | A | 0.35 | 0.13 | 8  |
| 10 | 104719096  | rs12413409 | CNNM2    | GWAS      | CAD | G/A | G | 0.08 | 0.77 | 4  |
| 11 | 103660567  | rs974819   | PDGFD    | Exome     | CAD | G/A | A | 0.28 | 0.91 | 8  |
| 11 | 116648917  | rs964184   | ZNF259   | Exome     | CAD | G/C | C | 0.16 | 0.73 | 4  |
| 13 | 110960712  | rs4773144  | COL4A1   | Exome     | CAD | A/G | G | 0.41 | 0.44 | 4  |
| 14 | 100133942  | rs2895811  | HHIPL1   | Exome     | CAD | A/G | G | 0.42 | 0.51 | 4  |
| 15 | 79089111   | rs3825807  | ADAMTS7  | Exome     | CAD | A/G | A | 0.47 | 0.26 | 4  |
| 17 | 2126504    | rs216172   | SMG6     | Exome     | CAD | G/C | C | 0.38 | 0.77 | 4  |
| 17 | 17543722   | rs12936587 | PEMT     | Exome     | CAD | G/A | G | 0.44 | 0.93 | 4  |
| 17 | 46988597   | rs46522    | UBE2Z    | Exome     | CAD | A/G | A | 0.46 | 0.35 | 4  |
| 19 | 11163601   | rs1122608  | SMARCA4  | Exome     | CAD | C/A | C | 0.26 | 0.90 | 4  |
| 1  | 40064961   | rs12037222 | PABPC4   | Imputed   | CRP | G/A | A | 0.23 | 1.00 | 10 |
| 1  | 66161461   | rs4420065  | LEPR     | Exome     | CRP | G/A | G | 0.40 | 0.63 | 10 |
| 1  | 154426264  | rs4129267  | IL6R     | Exome     | CRP | G/A | G | 0.38 | 1.00 | 10 |
| 1  | 159678816  | rs2794520  | CRP      | Exome     | CRP | G/A | G | 0.33 | 0.92 | 10 |
| 1  | 247601595  | rs12239046 | NLRP3    | Exome     | CRP | G/A | G | 0.37 | 0.07 | 10 |
| 2  | 27730940   | rs1260326  | GCKR     | Exome     | CRP | G/A | A | 0.39 | 0.24 | 10 |
| 2  | 113841030  | rs6734238  | IL1F10   | Exome     | CRP | A/G | G | 0.40 | 1.00 | 10 |
| 5  | 131839618  | rs4705952  | IRF1     | Exome     | CRP | A/G | G | 0.23 | 0.29 | 10 |

|    |           |            |          |           |                          |     |   |      |      |    |
|----|-----------|------------|----------|-----------|--------------------------|-----|---|------|------|----|
| 6  | 117114025 | rs6901250  | GPRC6A   | Exome     | CRP                      | G/A | A | 0.33 | 0.03 | 10 |
| 7  | 72971231  | rs13233571 | BCL7B    | Exome     | CRP                      | G/A | G | 0.12 | 1.00 | 10 |
| 8  | 9183358   | rs9987289  | PPP1R3B  | Exome     | CRP                      | G/A | A | 0.11 | 0.63 | 10 |
| 12 | 103483094 | rs10745954 | ASCL1    | Exome     | CRP                      | A/G | A | 0.49 | 0.78 | 10 |
| 12 | 121420807 | rs1183910  | HNF1A    | Exome     | CRP                      | G/A | G | 0.31 | 0.45 | 10 |
| 15 | 60894965  | rs340029   | RORA     | Exome     | CRP                      | A/G | A | 0.38 | 0.92 | 10 |
| 16 | 51158710  | rs10521222 | SALL1    | Exome     | CRP                      | G/A | G | 0.06 | 1.00 | 10 |
| 18 | 12821593  | rs2847281  | PTPN2    | Exome     | CRP                      | A/G | A | 0.41 | 0.02 | 10 |
| 19 | 45422946  | rs4420638  | APOC1    | Exome     | CRP                      | A/G | A | 0.16 | 0.31 | 10 |
| 20 | 43042364  | rs1800961  | HNF4A    | Exome     | CRP                      | G/A | G | 0.03 | 1.00 | 10 |
| 1  | 6279370   | rs846111   | RNF207   | Exome     | Electrocardiogram traits | G/C | C | 0.27 | 0.81 | 11 |
| 1  | 162085685 | rs10494366 | NOS1AP   | Exome     | Electrocardiogram traits | A/C | C | 0.34 | 0.47 | 12 |
| 1  | 162210610 | rs4657178  | NOS1AP   | Exome     | Electrocardiogram traits | G/A | A | 0.23 | 1.00 | 13 |
| 1  | 169099483 | rs10919071 | ATP1B1   | Exome     | Electrocardiogram traits | A/G | A | 0.12 | 1.00 | 13 |
| 3  | 38593393  | rs12053903 | SCN5A    | Exome     | Electrocardiogram traits | A/G | A | 0.32 | 1.00 | 11 |
| 3  | 38766675  | rs6795970  | SCN10A   | Exome     | Electrocardiogram traits | G/A | A | 0.38 | 0.49 | 14 |
| 4  | 86651464  | rs7660702  | ARHGAP24 | Exome     | Electrocardiogram traits | A/G | A | 0.32 | 0.83 | 12 |
| 6  | 36622900  | rs1321311  | CDKN1A   | Exome     | Electrocardiogram traits | C/A | A | 0.25 | 0.90 | 12 |
| 6  | 118653204 | rs12210810 | PLN      | Exome     | Electrocardiogram traits | G/C | G | 0.05 | 1.00 | 13 |
| 6  | 118680374 | rs11970286 | PLN      | Exome     | Electrocardiogram traits | G/A | A | 0.46 | 0.78 | 13 |
| 7  | 116186241 | rs3807989  | CAV1     | Exome     | Electrocardiogram traits | G/A | A | 0.42 | 0.10 | 12 |
| 7  | 150667210 | rs3807375  | KCNH2    | Exome     | Electrocardiogram traits | G/A | A | 0.38 | 0.32 | 12 |
| 11 | 2484803   | rs2074238  | KCNQ1    | Exome     | Electrocardiogram traits | G/A | G | 0.07 | 1.00 | 11 |
| 11 | 2502319   | rs12576239 | KCNQ1    | Exome     | Electrocardiogram traits | G/A | A | 0.13 | 0.84 | 11 |
| 12 | 114795443 | rs3825214  | TBX5     | Exome     | Electrocardiogram traits | A/G | G | 0.19 | 0.17 | 12 |
| 13 | 48162558  | rs2478333  | HTR2A    | Exome     | Electrocardiogram traits | C/A | A | 0.37 | 1.00 | 15 |
| 14 | 23861811  | rs365990   | MYH6     | Genotyped | Electrocardiogram traits | A/G | G | 0.38 | 0.23 | 12 |
| 16 | 11691753  | rs8049607  | LITAF    | Exome     | Electrocardiogram traits | G/A | A | 0.50 | 0.64 | 11 |
| 16 | 58622178  | rs7188697  | NDRG4    | Exome     | Electrocardiogram traits | A/G | A | 0.24 | 0.12 | 13 |
| 17 | 33324382  | rs2074518  | LIG3     | Exome     | Electrocardiogram traits | G/A | G | 0.42 | 0.15 | 11 |
| 17 | 68494992  | rs17779747 | KCNJ2    | Exome     | Electrocardiogram traits | C/A | C | 0.34 | 0.68 | 13 |
| 21 | 35880072  | rs727957   | KCNE1    | Exome     | Electrocardiogram traits | C/A | A | 0.17 | 0.19 | 12 |
| 1  | 214159256 | rs340874   | PROX1    | Exome     | Fasting glucose          | G/A | G | 0.42 | 0.34 | 16 |

|    |           |            |          |           |                 |     |   |      |      |    |
|----|-----------|------------|----------|-----------|-----------------|-----|---|------|------|----|
| 2  | 27741237  | rs780094   | GCKR     | Exome     | Fasting glucose | G/A | G | 0.38 | 0.27 | 16 |
| 2  | 169763148 | rs560887   | G6PC2    | Exome     | Fasting glucose | G/A | G | 0.30 | 0.12 | 16 |
| 3  | 123065778 | rs11708067 | ADCY5    | Exome     | Fasting glucose | A/G | A | 0.24 | 0.61 | 16 |
| 3  | 170717521 | rs11920090 | SLC2A2   | Exome     | Fasting glucose | T/A | T | 0.14 | 0.32 | 16 |
| 7  | 15064309  | rs2191349  | DGKB     | Exome     | Fasting glucose | A/C | A | 0.44 | 0.39 | 16 |
| 7  | 44235668  | rs4607517  | GCK      | Exome     | Fasting glucose | G/A | A | 0.20 | 0.88 | 16 |
| 8  | 118185733 | rs11558471 | SLC30A8  | Exome     | Fasting glucose | A/G | A | 0.31 | 0.19 | 16 |
| 9  | 4289050   | rs7034200  | GLIS3    | Exome     | Fasting glucose | C/A | A | 0.46 | 0.11 | 16 |
| 10 | 113042093 | rs10885122 | ADRA2A   | Exome     | Fasting glucose | C/A | C | 0.12 | 1.00 | 16 |
| 10 | 114756041 | rs4506565  | TCF7L2   | Exome     | Fasting glucose | A/T | T | 0.38 | 0.92 | 16 |
| 11 | 45873091  | rs11605924 | CRY2     | Exome     | Fasting glucose | C/A | A | 0.50 | 0.64 | 16 |
| 11 | 47336320  | rs7944584  | MADD     | Exome     | Fasting glucose | A/T | A | 0.28 | 0.49 | 16 |
| 11 | 61571478  | rs174550   | FADS1    | Exome     | Fasting glucose | A/G | A | 0.33 | 0.83 | 16 |
| 11 | 92708710  | rs10830963 | MTNR1B   | Exome     | Fasting glucose | C/G | G | 0.28 | 0.08 | 16 |
| 15 | 62433962  | rs11071657 | C2CD4B   | Exome     | Fasting glucose | A/G | A | 0.38 | 0.09 | 16 |
| 1  | 150951477 | rs267734   | ANXA9    | Exome     | eGFR            | A/G | A | 0.20 | 0.56 | 17 |
| 2  | 27730940  | rs1260326  | GCKR     | Exome     | eGFR            | G/A | G | 0.39 | 0.24 | 17 |
| 2  | 73900900  | rs10206899 | NAT8     | Exome     | eGFR            | A/G | A | 0.24 | 1.00 | 18 |
| 3  | 141807137 | rs347685   | TFDP2    | Exome     | eGFR            | A/C | A | 0.27 | 0.56 | 17 |
| 4  | 77398015  | rs10032549 | SHROOM3  | Imputed   | eGFR            | G/A | G | 0.49 | 0.44 | 18 |
| 5  | 176817636 | rs6420094  | SLC34A1  | Exome     | eGFR            | A/G | G | 0.35 | 0.13 | 17 |
| 6  | 43806609  | rs881858   | VEGFA    | Exome     | eGFR            | A/G | A | 0.28 | 0.82 | 17 |
| 6  | 160668389 | rs2279463  | SLC22A2  | Exome     | eGFR            | A/G | G | 0.13 | 0.53 | 17 |
| 7  | 77416439  | rs6465825  | TMEM60   | Exome     | eGFR            | A/G | G | 0.43 | 0.07 | 17 |
| 8  | 23751151  | rs10109414 | STC1     | Exome     | eGFR            | G/A | A | 0.43 | 0.39 | 17 |
| 9  | 71434707  | rs4744712  | PIP5K1B  | Imputed   | eGFR            | C/A | A | 0.38 | 0.10 | 17 |
| 10 | 1156165   | rs10794720 | WDR37    | Exome     | eGFR            | G/A | A | 0.07 | 0.29 | 17 |
| 11 | 30760335  | rs3925584  | MPPED2   | Exome     | eGFR            | A/G | A | 0.46 | 0.40 | 19 |
| 12 | 349298    | rs10774021 | SLC6A13  | Exome     | eGFR            | A/G | A | 0.37 | 0.11 | 17 |
| 12 | 112007756 | rs653178   | ATXN2    | Exome     | eGFR            | A/G | G | 0.50 | 0.31 | 17 |
| 13 | 72347696  | rs626277   | DACH1    | Exome     | eGFR            | A/C | A | 0.41 | 0.77 | 17 |
| 15 | 45719187  | rs17536527 | SPATA5L1 | Genotyped | eGFR            | G/C | C | 0.45 | 0.38 | 18 |
| 15 | 53946593  | rs491567   | WDR72    | Exome     | eGFR            | A/C | A | 0.25 | 0.39 | 17 |

|    |           |            |          |         |                 |     |   |      |      |    |
|----|-----------|------------|----------|---------|-----------------|-----|---|------|------|----|
| 15 | 76158983  | rs1394125  | UBE2Q2   | Exome   | eGFR            | G/A | A | 0.35 | 0.61 | 17 |
| 16 | 20367690  | rs12917707 | UMOD     | Exome   | eGFR            | C/A | C | 0.18 | 0.88 | 17 |
| 17 | 59456589  | rs9895661  | BCAS3    | Exome   | eGFR            | A/G | G | 0.15 | 0.37 | 17 |
| 19 | 33356891  | rs12460876 | SLC7A9   | Exome   | eGFR            | A/G | A | 0.39 | 0.20 | 17 |
| 20 | 23612737  | rs9111119  | CST3     | Exome   | eGFR            | A/G | A | 0.21 | 0.57 | 17 |
| 1  | 40028180  | rs4660293  | PABPC4   | Exome   | HDL cholesterol | A/G | G | 0.25 | 0.90 | 20 |
| 1  | 230295691 | rs4846914  | GALNT2   | Exome   | HDL cholesterol | A/G | G | 0.40 | 0.29 | 20 |
| 2  | 21206183  | rs6754295  | APOB     | Exome   | HDL cholesterol | A/C | A | 0.25 | 0.80 | 21 |
| 2  | 165540800 | rs12328675 | COBLL1   | Exome   | HDL cholesterol | A/G | A | 0.11 | 0.16 | 20 |
| 2  | 227100698 | rs2972146  | IRS1     | Exome   | HDL cholesterol | A/C | A | 0.36 | 0.84 | 20 |
| 5  | 53298025  | rs6450176  | ARL15    | Exome   | HDL cholesterol | G/A | A | 0.25 | 0.27 | 20 |
| 6  | 34552797  | rs2814944  | C6orf106 | Exome   | HDL cholesterol | G/A | A | 0.17 | 0.62 | 20 |
| 6  | 139829666 | rs605066   | CITED2   | Exome   | HDL cholesterol | A/G | G | 0.41 | 0.92 | 20 |
| 6  | 161089817 | rs1084651  | LPA      | Exome   | HDL cholesterol | G/A | A | 0.17 | 0.74 | 20 |
| 7  | 72982874  | rs17145738 | MLXIPL   | GWAS    | HDL cholesterol | C/T | C | 0.13 | 1.00 | 20 |
| 7  | 130433384 | rs4731702  | KLF14    | Exome   | HDL cholesterol | G/A | G | 0.45 | 0.16 | 20 |
| 8  | 9183358   | rs9987289  | PPP1R3B  | Exome   | HDL cholesterol | G/A | A | 0.11 | 0.63 | 20 |
| 8  | 19844222  | rs12678919 | LPL      | Exome   | HDL cholesterol | A/G | A | 0.09 | 0.41 | 20 |
| 8  | 126490972 | rs2954029  | TRIB1    | Imputed | HDL cholesterol | A/T | A | 0.46 | 0.30 | 20 |
| 9  | 15289578  | rs471364   | TTC39B   | GWAS    | HDL cholesterol | T/C | C | 0.10 | 0.48 | 22 |
| 9  | 107664301 | rs1883025  | ABCA1    | Exome   | HDL cholesterol | G/A | A | 0.26 | 1.00 | 20 |
| 11 | 46743247  | rs3136441  | F2       | Exome   | HDL cholesterol | A/G | A | 0.13 | 0.54 | 20 |
| 11 | 47286290  | rs7120118  | NR1H3    | Exome   | HDL cholesterol | A/G | A | 0.30 | 0.50 | 23 |
| 11 | 48518893  | rs7395662  | OR4A47   | Exome   | HDL cholesterol | G/A | G | 0.37 | 0.01 | 21 |
| 11 | 61569830  | rs174546   | FADS1    | Exome   | HDL cholesterol | G/A | A | 0.33 | 0.83 | 20 |
| 11 | 116648917 | rs964184   | APOA5    | Exome   | HDL cholesterol | G/C | C | 0.16 | 0.73 | 20 |
| 11 | 122522375 | rs7941030  | UBASH3B  | Exome   | HDL cholesterol | A/G | A | 0.38 | 0.24 | 20 |
| 12 | 20473758  | rs7134375  | PDE3A    | Exome   | HDL cholesterol | C/A | C | 0.43 | 0.39 | 20 |
| 12 | 57792580  | rs11613352 | LRP1     | Imputed | HDL cholesterol | C/T | C | 0.25 | 0.12 | 20 |
| 12 | 109895168 | rs2338104  | KCTD10   | GWAS    | HDL cholesterol | G/C | C | 0.48 | 0.52 | 22 |
| 12 | 124460167 | rs4765127  | ZNF664   | Exome   | HDL cholesterol | C/A | C | 0.33 | 0.14 | 20 |
| 15 | 58683366  | rs1532085  | LIPC     | Exome   | HDL cholesterol | G/A | G | 0.36 | 0.03 | 20 |
| 15 | 63396867  | rs2652834  | LACTB    | Exome   | HDL cholesterol | G/A | A | 0.19 | 0.18 | 20 |

|    |           |            |         |           |                 |     |   |      |      |    |
|----|-----------|------------|---------|-----------|-----------------|-----|---|------|------|----|
| 16 | 56993324  | rs3764261  | CETP    | Exome     | HDL cholesterol | C/A | C | 0.32 | 1.00 | 20 |
| 16 | 67902070  | rs2271293  | LCAT    | GWAS      | HDL cholesterol | G/A | G | 0.11 | 0.64 | 22 |
| 16 | 81534790  | rs2925979  | CMIP    | Exome     | HDL cholesterol | G/A | A | 0.32 | 0.75 | 20 |
| 17 | 37813856  | rs11869286 | STARD3  | Exome     | HDL cholesterol | G/C | C | 0.36 | 0.42 | 20 |
| 17 | 66875294  | rs4148008  | ABCA8   | Imputed   | HDL cholesterol | C/G | G | 0.31 | 0.83 | 20 |
| 17 | 76403984  | rs4129767  | PGS1    | Exome     | HDL cholesterol | G/A | G | 0.49 | 0.09 | 20 |
| 18 | 47167214  | rs4939883  | LIPG    | GWAS      | HDL cholesterol | C/T | T | 0.18 | 0.53 | 22 |
| 18 | 57849023  | rs12967135 | MC4R    | Imputed   | HDL cholesterol | G/A | A | 0.23 | 0.90 | 20 |
| 19 | 8469738   | rs2967605  | ANGPTL4 | Exome     | HDL cholesterol | G/A | A | 0.19 | 0.28 | 22 |
| 19 | 45422946  | rs4420638  | APOC1   | GWAS      | HDL cholesterol | T/C | C | 0.17 | 0.74 | 20 |
| 20 | 43042364  | rs1800961  | HNF4A   | Exome     | HDL cholesterol | G/A | A | 0.03 | 1.00 | 20 |
| 20 | 44576502  | rs7679     | PLTP    | GWAS      | HDL cholesterol | T/C | C | 0.22 | 0.67 | 22 |
| 1  | 25775733  | rs12027135 | TMEM57  | Exome     | LDL cholesterol | A/T | A | 0.45 | 0.93 | 20 |
| 1  | 55496039  | rs11206510 | PCSK9   | Exome     | LDL cholesterol | A/G | A | 0.22 | 1.00 | 22 |
| 1  | 55504650  | rs2479409  | PCSK9   | Exome     | LDL cholesterol | A/G | G | 0.35 | 0.18 | 20 |
| 1  | 63025942  | rs2131925  | DOCK7   | Exome     | LDL cholesterol | A/C | A | 0.36 | 1.00 | 20 |
| 1  | 109817590 | rs12740374 | CELSR2  | Exome     | LDL cholesterol | C/A | C | 0.24 | 0.90 | 22 |
| 1  | 220973563 | rs2642442  | MOSC1   | Genotyped | LDL cholesterol | T/C | C | 0.32 | 0.33 | 20 |
| 1  | 234858597 | rs514230   | IRF2BP2 | Genotyped | LDL cholesterol | A/T | A | 0.48 | 0.44 | 20 |
| 2  | 21286057  | rs515135   | APOB    | Exome     | LDL cholesterol | G/A | G | 0.16 | 0.23 | 22 |
| 2  | 44065090  | rs6756629  | ABCG5   | Exome     | LDL cholesterol | G/A | G | 0.07 | 0.16 | 21 |
| 2  | 44073881  | rs6544713  | ABCG8   | Exome     | LDL cholesterol | G/A | A | 0.32 | 0.59 | 22 |
| 5  | 74655726  | rs3846663  | HMGCR   | GWAS      | LDL cholesterol | C/T | T | 0.38 | 1.00 | 22 |
| 5  | 156398169 | rs1501908  | TIMD4   | GWAS      | LDL cholesterol | C/G | C | 0.39 | 0.21 | 22 |
| 6  | 16127407  | rs3757354  | IDOL    | Exome     | LDL cholesterol | G/A | G | 0.20 | 0.67 | 20 |
| 6  | 16197194  | rs2142672  | MYLIP   | Exome     | LDL cholesterol | G/A | G | 0.26 | 0.19 | 24 |
| 6  | 26093141  | rs1800562  | HFE     | Exome     | LDL cholesterol | G/A | G | 0.08 | 1.00 | 20 |
| 6  | 32412435  | rs3177928  | HLA     | Exome     | LDL cholesterol | G/A | A | 0.13 | 0.83 | 20 |
| 6  | 33143948  | rs2254287  | B3GALT4 | Exome     | LDL cholesterol | C/G | G | 0.41 | 0.25 | 25 |
| 6  | 160578860 | rs1564348  | LPA     | Exome     | LDL cholesterol | A/G | G | 0.16 | 0.49 | 20 |
| 7  | 21607352  | rs12670798 | DNAH11  | Exome     | LDL cholesterol | A/G | G | 0.22 | 0.59 | 20 |
| 7  | 44579180  | rs2072183  | NPC1L1  | Exome     | LDL cholesterol | C/G | G | 0.24 | 1.00 | 20 |
| 8  | 9183358   | rs9987289  | PPP1R3B | Exome     | LDL cholesterol | G/A | G | 0.11 | 0.63 | 20 |

|    |           |            |         |           |                 |     |   |      |      |    |
|----|-----------|------------|---------|-----------|-----------------|-----|---|------|------|----|
| 8  | 59388565  | rs2081687  | CYP7A1  | Exome     | LDL cholesterol | G/A | A | 0.36 | 0.69 | 20 |
| 8  | 126490972 | rs2954029  | TRIB1   | Imputed   | LDL cholesterol | A/T | A | 0.46 | 0.30 | 20 |
| 8  | 145043543 | rs11136341 | PLEC1   | Exome     | LDL cholesterol | A/G | G | 0.39 | 0.14 | 20 |
| 9  | 136155000 | rs635634   | ABO     | Exome     | LDL cholesterol | G/A | A | 0.20 | 0.66 | 20 |
| 10 | 113933886 | rs2255141  | GPAM    | Exome     | LDL cholesterol | G/A | A | 0.29 | 0.73 | 20 |
| 11 | 61569830  | rs174546   | FADS1   | Exome     | LDL cholesterol | G/A | G | 0.33 | 0.83 | 20 |
| 11 | 116648917 | rs964184   | APOA5   | Exome     | LDL cholesterol | G/C | C | 0.16 | 0.73 | 20 |
| 11 | 126243952 | rs11220462 | ST3GAL4 | Exome     | LDL cholesterol | G/A | A | 0.15 | 0.85 | 20 |
| 12 | 112072424 | rs11065987 | BRAP    | Exome     | LDL cholesterol | A/G | A | 0.44 | 0.22 | 20 |
| 12 | 121388962 | rs2650000  | HNF1A   | Exome     | LDL cholesterol | C/A | A | 0.35 | 0.54 | 22 |
| 14 | 24883887  | rs8017377  | NYNRIN  | Exome     | LDL cholesterol | G/A | A | 0.48 | 0.51 | 20 |
| 16 | 56993324  | rs3764261  | CETP    | Exome     | LDL cholesterol | C/A | C | 0.32 | 1.00 | 20 |
| 16 | 72108093  | rs2000999  | HPR     | Exome     | LDL cholesterol | G/A | A | 0.20 | 0.24 | 20 |
| 17 | 45425115  | rs7206971  | OSBPL7  | GWAS      | LDL cholesterol | G/A | G | 0.48 | 0.34 | 20 |
| 19 | 11202306  | rs6511720  | LDLR    | Exome     | LDL cholesterol | C/A | C | 0.14 | 0.18 | 20 |
| 19 | 19407718  | rs10401969 | SUGP1   | Exome     | LDL cholesterol | A/G | A | 0.10 | 1.00 | 20 |
| 19 | 45422946  | rs4420638  | APOC1   | GWAS      | LDL cholesterol | T/C | C | 0.17 | 0.74 | 20 |
| 20 | 39091487  | rs2902940  | MAFB    | Imputed   | LDL cholesterol | A/G | A | 0.33 | 0.23 | 20 |
| 20 | 39228784  | rs6102059  | MAFB    | Imputed   | LDL cholesterol | C/T | C | 0.31 | 0.91 | 22 |
| 20 | 39672618  | rs6029526  | TOP1    | Exome     | LDL cholesterol | T/A | A | 0.47 | 0.45 | 20 |
| 4  | 111718067 | rs6843082  | PITX2   | Exome     | Stroke          | A/G | G | 0.21 | 0.26 | 26 |
| 6  | 44594159  | rs556621   | CDC5L   | Genotyped | Stroke          | C/A | A | 0.32 | 1.00 | 27 |
| 7  | 19049388  | rs2107595  | HDAC9   | Genotyped | Stroke          | C/T | T | 0.16 | 1.00 | 26 |
| 12 | 783484    | rs12425791 | NINJ2   | Exome     | Stroke          | G/A | A | 0.19 | 0.77 | 28 |
| 16 | 73068678  | rs879324   | ZFHX3   | GWAS      | Stroke          | G/A | A | 0.18 | 0.54 | 26 |
| 1  | 120517959 | rs10923931 | NOTCH2  | GWAS      | Type 2 Diabetes | G/T | T | 0.10 | 0.29 | 29 |
| 1  | 212221342 | rs2075423  | PROX1   | Genotyped | Type 2 Diabetes | C/A | C | 0.33 | 1.00 | 30 |
| 2  | 43732823  | rs7578597  | THADA   | Exome     | Type 2 Diabetes | A/G | A | 0.08 | 0.34 | 29 |
| 2  | 60584819  | rs243021   | BCL11A  | Exome     | Type 2 Diabetes | G/A | A | 0.47 | 0.23 | 31 |
| 2  | 161171454 | rs7593730  | RBMS1   | Exome     | Type 2 Diabetes | G/A | G | 0.21 | 0.06 | 32 |
| 2  | 165528876 | rs13389219 | GRB14   | Exome     | Type 2 Diabetes | G/A | G | 0.38 | 0.55 | 30 |
| 2  | 227020653 | rs7578326  | IRS1    | Exome     | Type 2 Diabetes | A/G | A | 0.34 | 0.36 | 30 |
| 3  | 12393125  | rs1801282  | PPARG   | GWAS      | Type 2 Diabetes | C/G | C | 0.10 | 0.00 | 30 |



|    |           |            |            |           |                 |     |   |      |      |    |
|----|-----------|------------|------------|-----------|-----------------|-----|---|------|------|----|
| 3  | 23454790  | rs1496653  | UBE2E2     | GWAS      | Type 2 Diabetes | A/G | A | 0.19 | 0.55 | 30 |
| 3  | 64711904  | rs4607103  | ADAMTS9    | GWAS      | Type 2 Diabetes | C/T | C | 0.24 | 0.33 | 29 |
| 3  | 123065778 | rs11708067 | ADCY5      | Exome     | Type 2 Diabetes | A/G | A | 0.24 | 0.61 | 30 |
| 3  | 185511687 | rs4402960  | IGF2BP2    | GWAS      | Type 2 Diabetes | G/T | T | 0.36 | 1.00 | 30 |
| 4  | 6270056   | rs4689388  | WFS1       | Exome     | Type 2 Diabetes | A/G | A | 0.43 | 0.25 | 33 |
| 5  | 55806751  | rs459193   | ANKRD55    | Exome     | Type 2 Diabetes | G/A | G | 0.25 | 0.22 | 30 |
| 5  | 76424949  | rs4457053  | ZBED3      | Exome     | Type 2 Diabetes | A/G | G | 0.33 | 0.75 | 30 |
| 6  | 20688121  | rs10440833 | CDKA11     | Exome     | Type 2 Diabetes | T/A | A | 0.29 | 0.43 | 30 |
| 7  | 14864807  | rs17168486 | DGKB       | Genotyped | Type 2 Diabetes | C/T | T | 0.20 | 0.88 | 30 |
| 7  | 28180556  | rs864745   | JAZF1      | GWAS      | Type 2 Diabetes | C/T | T | 0.49 | 1.00 | 29 |
| 8  | 41519248  | rs516946   | ANK1       | Exome     | Type 2 Diabetes | G/A | G | 0.22 | 0.22 | 30 |
| 8  | 95960511  | rs896854   | TP53INP1   | Exome     | Type 2 Diabetes | G/A | A | 0.47 | 0.78 | 31 |
| 9  | 22134094  | rs10811661 | CDKN2B-AS1 | GWAS      | Type 2 Diabetes | T/C | T | 0.15 | 1.00 | 30 |
| 9  | 22137685  | rs7018475  | CDKN2B     | Genotyped | Type 2 Diabetes | T/G | T | 0.28 | 0.04 | 34 |
| 9  | 81952128  | rs13292136 | CHCHD9     | Exome     | Type 2 Diabetes | G/A | G | 0.07 | 0.73 | 31 |
| 9  | 84308948  | rs2796441  | TLE1       | Exome     | Type 2 Diabetes | G/A | G | 0.39 | 1.00 | 30 |
| 10 | 12328010  | rs12779790 | CDC123     | Genotyped | Type 2 Diabetes | A/G | G | 0.18 | 0.73 | 29 |
| 10 | 80942631  | rs12571751 | ZMIZ1      | Exome     | Type 2 Diabetes | A/G | A | 0.46 | 0.30 | 30 |
| 10 | 94465559  | rs5015480  | HHEX       | GWAS      | Type 2 Diabetes | C/T | C | 0.39 | 0.56 | 30 |
| 10 | 114758349 | rs7903146  | TCF7L2     | Exome     | Type 2 Diabetes | G/A | A | 0.36 | 0.84 | 30 |
| 11 | 2691471   | rs231362   | KCNQ1      | Genotyped | Type 2 Diabetes | C/T | C | 0.45 | 0.17 | 31 |
| 11 | 2803645   | rs163184   | KCNQ1      | Genotyped | Type 2 Diabetes | T/G | G | 0.49 | 1.00 | 30 |
| 11 | 17408630  | rs5215     | KCNJ11     | GWAS      | Type 2 Diabetes | T/C | C | 0.38 | 0.01 | 30 |
| 11 | 72433098  | rs1552224  | ARAP1      | Exome     | Type 2 Diabetes | A/C | A | 0.14 | 0.43 | 30 |
| 11 | 92673828  | rs1387153  | MTNR1B     | Exome     | Type 2 Diabetes | G/A | A | 0.30 | 0.91 | 31 |
| 12 | 27956150  | rs10842994 | KLHDC5     | GWAS      | Type 2 Diabetes | C/T | C | 0.17 | 0.49 | 30 |
| 12 | 66174894  | rs1531343  | HMGA2      | GWAS      | Type 2 Diabetes | G/C | C | 0.09 | 0.76 | 31 |
| 12 | 71663102  | rs7961581  | TSPAN8     | GWAS      | Type 2 Diabetes | T/C | C | 0.32 | 0.58 | 29 |
| 12 | 121460686 | rs7957197  | HNF1A      | Exome     | Type 2 Diabetes | T/A | T | 0.19 | 0.55 | 31 |
| 13 | 80717156  | rs1359790  | SPRY2      | GWAS      | Type 2 Diabetes | G/A | G | 0.28 | 0.91 | 30 |
| 15 | 77832762  | rs7177055  | HMG20A     | Exome     | Type 2 Diabetes | A/G | A | 0.25 | 0.32 | 30 |
| 15 | 80432222  | rs11634397 | ZFAND6     | Exome     | Type 2 Diabetes | G/A | G | 0.33 | 0.35 | 31 |

|    |           |            |          |           |                   |     |   |      |      |    |
|----|-----------|------------|----------|-----------|-------------------|-----|---|------|------|----|
| 15 | 91521337  | rs8042680  | PRC1     | Exome     | Type 2 Diabetes   | C/A | A | 0.30 | 0.38 | 31 |
| 16 | 53816275  | rs8050136  | FTO      | GWAS      | Type 2 Diabetes   | C/A | A | 0.43 | 0.51 | 29 |
| 16 | 73804746  | rs7202877  | CTRB2    | Genotyped | Type 2 Diabetes   | T/G | T | 0.07 | 0.76 | 30 |
| 18 | 7068462   | rs8090011  | LAMA1    | Genotyped | Type 2 Diabetes   | C/G | G | 0.38 | 0.06 | 35 |
| 18 | 57884750  | rs12970134 | MC4R     | Exome     | Type 2 Diabetes   | G/A | A | 0.27 | 0.55 | 30 |
| 19 | 19407718  | rs10401969 | CILP2    | Exome     | Type 2 Diabetes   | A/G | G | 0.10 | 1.00 | 30 |
| 23 | 152899922 | rs5945326  | DUSP9    | Genotyped | Type 2 Diabetes   | A/G | A | 0.21 | 0.27 | 31 |
| 1  | 25768937  | rs10903129 | TMEM57   | Exome     | Total Cholesterol | G/A | G | 0.44 | 1.00 | 21 |
| 1  | 55504650  | rs2479409  | PCSK9    | Exome     | Total Cholesterol | A/G | G | 0.35 | 0.18 | 20 |
| 1  | 63118196  | rs10889353 | DOCK7    | GWAS      | Total Cholesterol | A/C | A | 0.34 | 0.84 | 21 |
| 1  | 93009438  | rs7515577  | EVI5     | Exome     | Total Cholesterol | A/C | A | 0.22 | 1.00 | 20 |
| 1  | 109818530 | rs646776   | CELSR2   | Exome     | Total Cholesterol | A/G | A | 0.24 | 0.80 | 21 |
| 1  | 220973563 | rs2642442  | MOSC1    | Genotyped | Total Cholesterol | T/C | C | 0.32 | 0.33 | 20 |
| 1  | 234858597 | rs514230   | IRF2BP2  | Genotyped | Total Cholesterol | A/T | A | 0.48 | 0.44 | 20 |
| 2  | 21232195  | rs693      | APOB     | GWAS      | Total Cholesterol | G/A | A | 0.49 | 0.71 | 21 |
| 2  | 27730940  | rs1260326  | GCKR     | Exome     | Total Cholesterol | G/A | A | 0.39 | 0.24 | 20 |
| 2  | 44065090  | rs6756629  | ABCG5    | Exome     | Total Cholesterol | G/A | G | 0.07 | 0.16 | 21 |
| 2  | 135837906 | rs7570971  | RAB3GAP1 | Exome     | Total Cholesterol | C/A | A | 0.32 | 0.24 | 20 |
| 3  | 12628920  | rs2290159  | RAF1     | Exome     | Total Cholesterol | G/C | G | 0.19 | 0.55 | 20 |
| 5  | 74651084  | rs3846662  | HMGCR    | Exome     | Total Cholesterol | A/G | G | 0.42 | 0.85 | 21 |
| 5  | 156390297 | rs6882076  | TIMD4    | Exome     | Total Cholesterol | G/A | G | 0.39 | 0.14 | 20 |
| 6  | 16127407  | rs3757354  | IDOL     | Exome     | Total Cholesterol | G/A | G | 0.20 | 0.67 | 20 |
| 6  | 26093141  | rs1800562  | HFE      | Exome     | Total Cholesterol | G/A | G | 0.08 | 1.00 | 20 |
| 6  | 32412435  | rs3177928  | HLA      | Exome     | Total Cholesterol | G/A | A | 0.13 | 0.83 | 20 |
| 6  | 34546560  | rs2814982  | C6orf106 | Exome     | Total Cholesterol | G/A | G | 0.10 | 0.42 | 20 |
| 6  | 160578860 | rs1564348  | LPA      | Exome     | Total Cholesterol | A/G | G | 0.16 | 0.49 | 20 |
| 7  | 21607352  | rs12670798 | DNAH11   | Exome     | Total Cholesterol | A/G | G | 0.22 | 0.59 | 20 |
| 7  | 44579180  | rs2072183  | NPC1L1   | Exome     | Total Cholesterol | C/G | G | 0.24 | 1.00 | 20 |
| 8  | 9183358   | rs9987289  | PPP1R3B  | Exome     | Total Cholesterol | G/A | G | 0.11 | 0.63 | 20 |
| 8  | 18272881  | rs1495741  | NAT2     | Exome     | Total Cholesterol | A/G | G | 0.21 | 0.67 | 20 |
| 8  | 59388565  | rs2081687  | CYP7A1   | Exome     | Total Cholesterol | G/A | A | 0.36 | 0.69 | 20 |
| 8  | 116648565 | rs2737229  | TRPS1    | Exome     | Total Cholesterol | A/C | A | 0.32 | 0.60 | 20 |
| 8  | 126490972 | rs2954029  | TRIB1    | Imputed   | Total Cholesterol | A/T | A | 0.46 | 0.30 | 20 |

|    |           |            |         |         |                   |     |   |      |      |    |
|----|-----------|------------|---------|---------|-------------------|-----|---|------|------|----|
| 8  | 145043543 | rs11136341 | PLEC1   | Exome   | Total Cholesterol | A/G | G | 0.39 | 0.14 | 20 |
| 9  | 107664301 | rs1883025  | ABCA1   | Exome   | Total Cholesterol | G/A | G | 0.26 | 1.00 | 20 |
| 9  | 136155000 | rs635634   | ABO     | Exome   | Total Cholesterol | G/A | A | 0.20 | 0.66 | 20 |
| 10 | 113933886 | rs2255141  | GPAM    | Exome   | Total Cholesterol | G/A | A | 0.29 | 0.73 | 20 |
| 11 | 18632984  | rs10128711 | SPTY2D1 | Exome   | Total Cholesterol | G/A | G | 0.24 | 0.71 | 20 |
| 11 | 61597212  | rs174570   | FADS2   | Exome   | Total Cholesterol | G/A | G | 0.13 | 1.00 | 21 |
| 11 | 116648917 | rs964184   | APOA5   | Exome   | Total Cholesterol | G/C | C | 0.16 | 0.73 | 20 |
| 11 | 122522375 | rs7941030  | UBASH3B | Exome   | Total Cholesterol | A/G | G | 0.38 | 0.24 | 20 |
| 11 | 126243952 | rs11220462 | ST3GAL4 | Exome   | Total Cholesterol | G/A | A | 0.15 | 0.85 | 20 |
| 12 | 112072424 | rs11065987 | BRAP    | Exome   | Total Cholesterol | A/G | A | 0.44 | 0.22 | 20 |
| 16 | 56993324  | rs3764261  | CETP    | Exome   | Total Cholesterol | C/A | A | 0.32 | 1.00 | 20 |
| 16 | 72108093  | rs2000999  | HPR     | Exome   | Total Cholesterol | G/A | A | 0.20 | 0.24 | 20 |
| 17 | 45425115  | rs7206971  | OSBPL7  | GWAS    | Total Cholesterol | G/A | A | 0.48 | 0.34 | 20 |
| 19 | 11210912  | rs2228671  | LDLR    | Exome   | Total Cholesterol | G/A | G | 0.14 | 0.56 | 21 |
| 19 | 19789528  | rs2304130  | NCAN    | Exome   | Total Cholesterol | A/G | A | 0.11 | 0.82 | 21 |
| 19 | 45395619  | rs2075650  | TOMM40  | Exome   | Total Cholesterol | A/G | G | 0.12 | 0.18 | 21 |
| 19 | 49206417  | rs492602   | FUT2    | Exome   | Total Cholesterol | A/G | G | 0.49 | 0.85 | 20 |
| 20 | 39091487  | rs2902940  | MAFB    | Imputed | Total Cholesterol | A/G | A | 0.33 | 0.23 | 20 |
| 20 | 39672618  | rs6029526  | TOP1    | Exome   | Total Cholesterol | T/A | A | 0.47 | 0.45 | 20 |
| 20 | 43042364  | rs1800961  | HNF4A   | Exome   | Total Cholesterol | G/A | G | 0.03 | 1.00 | 20 |
| 1  | 63025942  | rs2131925  | DOCK7   | Exome   | Triglycerides     | A/C | A | 0.36 | 1.00 | 20 |
| 1  | 230295691 | rs4846914  | GALNT2  | Exome   | Triglycerides     | A/G | G | 0.40 | 0.29 | 20 |
| 2  | 21206183  | rs6754295  | APOB    | Exome   | Triglycerides     | A/C | A | 0.25 | 0.80 | 21 |
| 2  | 27730940  | rs1260326  | GCKR    | Exome   | Triglycerides     | G/A | A | 0.39 | 0.24 | 20 |
| 2  | 165513091 | rs10195252 | COBLL1  | Exome   | Triglycerides     | A/G | A | 0.40 | 0.92 | 20 |
| 2  | 227100698 | rs2972146  | IRS1    | Exome   | Triglycerides     | A/C | A | 0.36 | 0.84 | 20 |
| 3  | 135926622 | rs645040   | MSL2L1  | Exome   | Triglycerides     | A/C | A | 0.22 | 0.43 | 20 |
| 4  | 88030261  | rs442177   | AFF1    | Exome   | Triglycerides     | A/C | A | 0.39 | 1.00 | 20 |
| 5  | 55861786  | rs9686661  | ANKRD55 | Exome   | Triglycerides     | G/A | A | 0.23 | 0.60 | 20 |
| 5  | 156390297 | rs6882076  | TIMD4   | Exome   | Triglycerides     | G/A | A | 0.39 | 0.14 | 20 |
| 6  | 31265490  | rs2247056  | HLA     | Exome   | Triglycerides     | G/A | G | 0.25 | 0.71 | 20 |
| 7  | 72982874  | rs17145738 | MLXIPL  | GWAS    | Triglycerides     | C/T | C | 0.13 | 1.00 | 20 |
| 8  | 11045161  | rs7819412  | XKR6    | GWAS    | Triglycerides     | G/A | A | 0.48 | 0.46 | 22 |

|    |           |            |         |         |               |     |   |      |      |    |
|----|-----------|------------|---------|---------|---------------|-----|---|------|------|----|
| 8  | 18272881  | rs1495741  | NAT2    | Exome   | Triglycerides | A/G | G | 0.21 | 0.67 | 20 |
| 8  | 19844222  | rs12678919 | LPL     | Exome   | Triglycerides | A/G | A | 0.09 | 0.41 | 20 |
| 8  | 126486409 | rs17321515 | TRIB1   | GWAS    | Triglycerides | A/G | A | 0.47 | 0.71 | 25 |
| 10 | 65027610  | rs10761731 | JMJD1C  | Exome   | Triglycerides | A/T | A | 0.41 | 0.85 | 20 |
| 10 | 94839642  | rs2068888  | CYP26A1 | Exome   | Triglycerides | G/A | G | 0.44 | 0.78 | 20 |
| 11 | 61569830  | rs174546   | FADS1   | Exome   | Triglycerides | G/A | A | 0.33 | 0.83 | 20 |
| 11 | 116652207 | rs12286037 | ZNF259  | GWAS    | Triglycerides | C/T | T | 0.08 | 1.00 | 25 |
| 11 | 116732512 | rs2075292  | SIK3    | Exome   | Triglycerides | A/C | C | 0.11 | 0.09 | 36 |
| 12 | 57792580  | rs11613352 | LRP1    | Imputed | Triglycerides | C/T | C | 0.25 | 0.12 | 20 |
| 12 | 124460167 | rs4765127  | ZNF664  | Exome   | Triglycerides | C/A | C | 0.33 | 0.14 | 20 |
| 15 | 42683787  | rs2412710  | CAPN3   | Exome   | Triglycerides | G/A | A | 0.02 | 1.00 | 20 |
| 15 | 44245931  | rs2929282  | FRMD5   | Exome   | Triglycerides | A/T | T | 0.05 | 1.00 | 20 |
| 15 | 58683366  | rs1532085  | LIPC    | Exome   | Triglycerides | G/A | G | 0.36 | 0.03 | 20 |
| 16 | 30918487  | rs11649653 | CTF1    | GWAS    | Triglycerides | C/G | C | 0.36 | 0.36 | 20 |
| 16 | 56993324  | rs3764261  | CETP    | Exome   | Triglycerides | C/A | C | 0.32 | 1.00 | 20 |
| 19 | 19407718  | rs10401969 | SUGP1   | Exome   | Triglycerides | A/G | A | 0.10 | 1.00 | 20 |
| 19 | 45414451  | rs439401   | APOE    | Exome   | Triglycerides | G/A | G | 0.37 | 0.84 | 20 |
| 20 | 44576502  | rs7679     | PLTP    | GWAS    | Triglycerides | T/C | C | 0.22 | 0.67 | 22 |
| 22 | 38546033  | rs5756931  | PLA2G6  | Exome   | Triglycerides | A/G | A | 0.39 | 0.84 | 20 |

## References

1. Wain, L., et al., Genome-wide association study identifies six new loci influencing pulse pressure and mean arterial pressure. *Nature genetics*, 2011. 43(10): p. 1005-1011.
2. Speliotes, E., et al., Association analyses of 249,796 individuals reveal 18 new loci associated with body mass index. *Nature genetics*, 2010. 42(11): p. 937-948.
3. O'Donnell, C., et al., Genome-wide association study for coronary artery calcification with follow-up in myocardial infarction. *Circulation*, 2011. 124(25): p. 2855-2864.
4. Schunkert, H., et al., Large-scale association analysis identifies 13 new susceptibility loci for coronary artery disease. *Nat Genet*, 2011. 43(4): p. 333-8.
5. Erdmann, J., et al., New susceptibility locus for coronary artery disease on chromosome 3q22.3. *Nat Genet*, 2009. 41(3): p. 280-2.
6. Davies, R.W., et al., A genome-wide association study for coronary artery disease identifies a novel susceptibility locus in the major histocompatibility complex. *Circ Cardiovasc Genet*, 2012. 5(2): p. 217-25.
7. Samani, N.J., et al., Genomewide association analysis of coronary artery disease. *N Engl J Med*, 2007. 357(5): p. 443-53.

8. Coronary Artery Disease Genetics, C., A genome-wide association study in Europeans and South Asians identifies five new loci for coronary artery disease. *Nature genetics*, 2011. 43(4): p. 339-344.
9. Wild, P.S., et al., A genome-wide association study identifies LIPA as a susceptibility gene for coronary artery disease. *Circ Cardiovasc Genet*, 2011. 4(4): p. 403-12.
10. Dehghan, A., et al., Meta-analysis of genome-wide association studies in >80 000 subjects identifies multiple loci for C-reactive protein levels. *Circulation*, 2011. 123(7): p. 731-8.
11. Newton-Cheh, C., et al., Common variants at ten loci influence QT interval duration in the QTGEN Study. *Nature genetics*, 2009. 41(4): p. 399-406.
12. Holm, H., et al., Several common variants modulate heart rate, PR interval and QRS duration. *Nat Genet*, 2010. 42(2): p. 117-22.
13. Pfeufer, A., et al., Common variants at ten loci modulate the QT interval duration in the QTSCD Study. *Nat Genet*, 2009. 41(4): p. 407-14.
14. Ritchie, M.D., et al., Genome- and phenome-wide analyses of cardiac conduction identifies markers of arrhythmia risk. *Circulation*, 2013. 127(13): p. 1377-85.
15. Marroni, F., et al., A genome-wide association scan of RR and QT interval duration in 3 European genetically isolated populations: the EUROSPAN project. *Circ Cardiovasc Genet*, 2009. 2(4): p. 322-8.
16. Dupuis, J., et al., New genetic loci implicated in fasting glucose homeostasis and their impact on type 2 diabetes risk. *Nature genetics*, 2010. 42(2): p. 105-116.
17. Köttgen, A., et al., New loci associated with kidney function and chronic kidney disease. *Nature genetics*, 2010. 42(5): p. 376-384.
18. Tin, A., et al., Using multiple measures for quantitative trait association analyses: application to estimated glomerular filtration rate. *J Hum Genet*, 2013. 58(7): p. 461-6.
19. Pattaro, C., et al., Genome-wide association and functional follow-up reveals new loci for kidney function. *PLoS Genet*, 2012. 8(3): p. e1002584.
20. Teslovich, T., et al., Biological, clinical and population relevance of 95 loci for blood lipids. *Nature*, 2010. 466(7307): p. 707-713.
21. Aulchenko, Y.S., et al., Loci influencing lipid levels and coronary heart disease risk in 16 European population cohorts. *Nat Genet*, 2009. 41(1): p. 47-55.
22. Kathiresan, S., et al., Common variants at 30 loci contribute to polygenic dyslipidemia. *Nature genetics*, 2009. 41(1): p. 56-65.
23. Sabatti, C., et al., Genome-wide association analysis of metabolic traits in a birth cohort from a founder population. *Nat Genet*, 2009. 41(1): p. 35-46.
24. Waterworth, D.M., et al., Genetic variants influencing circulating lipid levels and risk of coronary artery disease. *Arterioscler Thromb Vasc Biol*, 2010. 30(11): p. 2264-76.
25. Willer, C.J., et al., Newly identified loci that influence lipid concentrations and risk of coronary artery disease. *Nat Genet*, 2008. 40(2): p. 161-9.
26. Traylor, M., et al., Genetic risk factors for ischaemic stroke and its subtypes (the METASTROKE collaboration): a meta-analysis of genome-wide association studies. *Lancet Neurol*, 2012. 11(11): p. 951-62.

27. Holliday, E.G., et al., Common variants at 6p21.1 are associated with large artery atherosclerotic stroke. *Nat Genet*, 2012. 44(10): p. 1147-51.
28. Ikram, M.A., et al., Genomewide association studies of stroke. *N Engl J Med*, 2009. 360(17): p. 1718-28.
29. Zeggini, E., et al., Meta-analysis of genome-wide association data and large-scale replication identifies additional susceptibility loci for type 2 diabetes. *Nature genetics*, 2008. 40(5): p. 638-645.
30. Morris, A., et al., Large-scale association analysis provides insights into the genetic architecture and pathophysiology of type 2 diabetes. *Nature genetics*, 2012. 44(9): p. 981-990.
31. Voight, B.F., et al., Twelve type 2 diabetes susceptibility loci identified through large-scale association analysis. *Nat Genet*, 2010. 42(7): p. 579-89.
32. Qi, L., et al., Genetic variants at 2q24 are associated with susceptibility to type 2 diabetes. *Hum Mol Genet*, 2010. 19(13): p. 2706-15.
33. Rung, J., et al., Genetic variant near IRS1 is associated with type 2 diabetes, insulin resistance and hyperinsulinemia. *Nat Genet*, 2009. 41(10): p. 1110-5.
34. Huang, J., et al., 1000 Genomes-based imputation identifies novel and refined associations for the Wellcome Trust Case Control Consortium phase 1 Data. *Eur J Hum Genet*, 2012. 20(7): p. 801-5.
35. Perry, J., et al., Stratifying type 2 diabetes cases by BMI identifies genetic risk variants in LAMA1 and enrichment for risk variants in lean compared to obese cases. *PLoS Genetics*, 2012. 8(5).
36. Kooner, J.S., et al., Genome-wide scan identifies variation in MLXIPL associated with plasma triglycerides. *Nat Genet*, 2008. 40(2): p. 149-51.
