# Supplementary material
Source: PubMed Central journal article supplement (PMC4506855)
Supplement: NIHMS666397-supplement-592_2015_720_MOESM2_ESM.pdf [file NIHMS666397-supplement-592_2015_720_MOESM2_ESM.pdf]

Supplementary Table 2: Single SNP association results for SNPs included in genetic risk scores. Association analyses were adjusted for age and sex. All associations are reported for the risk allele. Abbreviations: CAC, coronary artery calcification; CAD, coronary artery disease; CRP, C-reactive protein; eGFR, estimated glomerular filtration rate; MI, myocardial infarction; OR, odds ratio. For trait of interest analyses, beta values are shown for continuous traits and odds ratios are shown for dichotomous traits.

| SNP        | Risk Score            | Alleles (M/m) | Risk Allele | Trait of interest in DHS | Trait of interest |               | All-Cause Mortality |      | CVD Mortality |      | Self-reported History of MI |      | Self-reported History of CVD |      | Coronary Artery Calcification |            |
|------------|-----------------------|---------------|-------------|--------------------------|-------------------|---------------|---------------------|------|---------------|------|-----------------------------|------|------------------------------|------|-------------------------------|------------|
|            |                       |               |             |                          | p-value           | beta value/OR | p-value             | OR   | p-value       | OR   | p-value                     | OR   | p-value                      | OR   | p-value                       | beta value |
| rs17367504 | Blood pressure traits | A/G           | A           | Pulse pressure           | 0.763             | 0.285         | 0.426               | 0.94 | 0.992         | 1.00 | 0.418                       | 0.93 | 0.158                        | 0.89 | 0.188                         | -0.181     |
| rs13082711 | Blood pressure traits | T/C           | C           | Pulse pressure           | 0.063             | -1.625        | 0.689               | 0.97 | 0.801         | 1.02 | 0.350                       | 0.93 | 0.852                        | 1.01 | 0.747                         | 0.041      |
| rs319690   | Blood pressure traits | T/C           | T           | Pulse pressure           | 0.916             | 0.084         | 0.749               | 0.98 | 0.811         | 0.98 | 0.097                       | 0.88 | 0.555                        | 0.96 | 0.724                         | 0.041      |
| rs419076   | Blood pressure traits | T/C           | T           | Pulse pressure           | 0.508             | -0.470        | 0.102               | 1.11 | 0.311         | 1.08 | 0.505                       | 0.96 | 0.079                        | 1.11 | 0.325                         | -0.103     |
| rs871606   | Blood pressure traits | T/C           | T           | Pulse pressure           | 0.047             | 2.630         | 0.764               | 1.04 | 0.772         | 1.04 | 0.525                       | 1.08 | 0.983                        | 1.00 | 0.399                         | -0.161     |
| rs1458038  | Blood pressure traits | G/A           | A           | Pulse pressure           | 0.565             | -0.468        | 0.631               | 0.97 | 0.865         | 1.01 | 0.668                       | 1.03 | 0.830                        | 0.99 | 0.615                         | -0.061     |
| rs13107325 | Blood pressure traits | G/A           | G           | Pulse pressure           | 0.674             | 0.585         | 0.149               | 0.83 | 0.762         | 0.96 | 0.733                       | 0.96 | 0.860                        | 1.02 | 0.939                         | 0.015      |
| rs1173771  | Blood pressure traits | C/T           | C           | Pulse pressure           | 0.262             | 0.844         | 0.749               | 0.98 | 0.631         | 0.96 | 0.426                       | 1.06 | 0.359                        | 0.94 | 0.228                         | -0.134     |
| rs9313772  | Blood pressure traits | C/T           | C           | Pulse pressure           | 0.268             | 0.826         | 0.257               | 0.93 | 0.610         | 0.96 | 0.496                       | 0.95 | 0.690                        | 0.98 | 0.499                         | 0.074      |
| rs198846   | Blood pressure traits | G/A           | A           | Pulse pressure           | 0.260             | -1.042        | 0.885               | 0.99 | 0.684         | 0.96 | 0.031                       | 1.22 | 0.073                        | 1.15 | 0.935                         | -0.011     |
| rs17477177 | Blood pressure traits | T/C           | C           | Pulse pressure           | 0.294             | 0.937         | 0.491               | 1.06 | 0.377         | 0.92 | 0.911                       | 1.01 | 0.487                        | 0.95 | 0.857                         | 0.024      |
| rs2071518  | Blood pressure traits | C/T           | T           | Pulse pressure           | 0.223             | 0.980         | 0.581               | 0.96 | 0.889         | 1.01 | 0.991                       | 1.00 | 0.742                        | 1.02 | 0.345                         | -0.110     |
| rs12258967 | Blood pressure traits | C/G           | C           | Pulse pressure           | 0.312             | 0.797         | 0.975               | 1.00 | 0.918         | 0.99 | 0.291                       | 1.08 | 0.776                        | 0.98 | 0.628                         | -0.057     |
| rs4590817  | Blood pressure traits | G/C           | G           | Pulse pressure           | 0.563             | 0.577         | 0.154               | 0.88 | 0.438         | 1.08 | 0.982                       | 1.00 | 0.526                        | 0.95 | 0.346                         | -0.137     |
| rs9663362  | Blood pressure traits | G/C           | C           | Pulse pressure           | 0.319             | 0.723         | 0.253               | 0.93 | 0.671         | 1.03 | 0.299                       | 0.93 | 0.725                        | 1.02 | 0.260                         | 0.120      |
| rs11191548 | Blood pressure traits | A/G           | A           | Pulse pressure           | 0.708             | -0.491        | 0.156               | 0.84 | 0.788         | 0.96 | 0.703                       | 1.05 | 0.841                        | 1.02 | 0.395                         | 0.162      |
| rs381815   | Blood pressure traits | C/T           | T           | Pulse pressure           | 0.051             | -1.584        | 0.070               | 0.88 | 0.512         | 0.95 | 0.567                       | 1.04 | 0.174                        | 1.10 | 0.295                         | -0.125     |

|            |                       |     |   |                |       |         |       |      |       |      |       |      |       |      |       |        |
|------------|-----------------------|-----|---|----------------|-------|---------|-------|------|-------|------|-------|------|-------|------|-------|--------|
| rs11222084 | Blood pressure traits | A/T | T | Pulse pressure | 0.685 | 0.315   | 0.189 | 1.09 | 0.703 | 0.97 | 0.137 | 1.11 | 0.584 | 0.97 | 0.277 | 0.125  |
| rs17249754 | Blood pressure traits | G/A | G | Pulse pressure | 0.144 | -1.387  | 0.849 | 0.98 | 0.762 | 1.03 | 0.538 | 1.06 | 0.041 | 1.17 | 0.368 | -0.125 |
| rs653178   | Blood pressure traits | A/G | G | Pulse pressure | 0.365 | 0.632   | 0.447 | 1.05 | 0.570 | 0.96 | 0.095 | 0.90 | 0.167 | 0.92 | 0.062 | -0.192 |
| rs1378942  | Blood pressure traits | A/C | C | Pulse pressure | 0.075 | 1.417   | 0.959 | 1.00 | 0.741 | 0.97 | 0.107 | 1.13 | 0.292 | 1.07 | 0.056 | -0.224 |
| rs17608766 | Blood pressure traits | A/G | G | Pulse pressure | 0.406 | 0.819   | 0.769 | 0.98 | 0.997 | 1.00 | 0.311 | 0.91 | 0.844 | 0.98 | 0.276 | 0.154  |
| rs1327235  | Blood pressure traits | A/G | G | Pulse pressure | 0.505 | 0.473   | 0.757 | 1.02 | 0.566 | 0.96 | 0.311 | 1.07 | 0.523 | 1.04 | 0.879 | 0.016  |
| rs6015450  | Blood pressure traits | A/G | G | Pulse pressure | 0.310 | 1.173   | 0.001 | 1.44 | 0.001 | 1.57 | 0.868 | 1.02 | 0.729 | 1.03 | 0.479 | 0.121  |
| rs2815752  | BMI                   | A/G | A | BMI            | 0.555 | 0.015   | 0.309 | 0.93 | 0.172 | 0.90 | 0.373 | 0.94 | 0.033 | 0.88 | 0.335 | 0.104  |
| rs1514175  | BMI                   | G/A | A | BMI            | 0.998 | -0.0001 | 0.571 | 0.96 | 0.970 | 1.00 | 0.824 | 0.99 | 0.958 | 1.00 | 0.550 | -0.063 |
| rs1555543  | BMI                   | C/A | C | BMI            | 0.343 | 0.025   | 0.283 | 0.93 | 0.046 | 0.85 | 0.041 | 0.86 | 0.413 | 1.05 | 0.583 | -0.060 |
| rs543874   | BMI                   | A/G | G | BMI            | 0.139 | 0.047   | 0.084 | 0.87 | 0.150 | 0.88 | 0.442 | 0.94 | 0.821 | 0.98 | 0.728 | 0.046  |
| rs2867125  | BMI                   | G/A | G | BMI            | 0.287 | -0.039  | 0.580 | 0.95 | 0.867 | 1.02 | 0.783 | 1.03 | 0.073 | 1.17 | 0.648 | -0.069 |
| rs713586   | BMI                   | A/G | G | BMI            | 0.076 | 0.045   | 0.329 | 1.06 | 0.807 | 0.98 | 0.911 | 1.01 | 0.261 | 0.93 | 0.605 | 0.054  |
| rs887912   | BMI                   | G/A | A | BMI            | 0.898 | 0.004   | 0.049 | 1.15 | 0.720 | 1.03 | 0.358 | 0.93 | 0.220 | 0.92 | 0.169 | 0.157  |
| rs2890652  | BMI                   | T/C | C | BMI            | 0.762 | -0.011  | 0.594 | 0.95 | 0.577 | 0.94 | 0.677 | 0.96 | 0.513 | 0.95 | 0.790 | -0.038 |
| rs13078807 | BMI                   | A/G | G | BMI            | 0.008 | 0.082   | 0.861 | 0.99 | 0.608 | 0.95 | 0.254 | 0.91 | 0.189 | 0.91 | 0.693 | 0.050  |
| rs9816226  | BMI                   | A/T | A | BMI            | 0.035 | -0.070  | 0.133 | 0.88 | 0.194 | 0.88 | 0.063 | 1.18 | 0.252 | 1.09 | 0.076 | 0.247  |
| rs10938397 | BMI                   | A/G | G | BMI            | 0.716 | 0.010   | 0.933 | 0.99 | 0.962 | 1.00 | 0.633 | 1.03 | 0.398 | 1.05 | 0.889 | 0.015  |
| rs13107325 | BMI                   | G/A | A | BMI            | 0.752 | -0.016  | 0.149 | 1.20 | 0.762 | 1.05 | 0.733 | 1.05 | 0.860 | 0.98 | 0.939 | -0.015 |
| rs2112347  | BMI                   | A/C | A | BMI            | 0.968 | -0.001  | 0.111 | 0.90 | 0.784 | 1.02 | 0.430 | 0.95 | 0.950 | 1.00 | 0.896 | 0.014  |
| rs206936   | BMI                   | A/G | G | BMI            | 0.057 | 0.059   | 0.004 | 0.80 | 0.297 | 0.91 | 0.718 | 0.97 | 0.548 | 1.04 | 0.506 | 0.084  |
| rs987237   | BMI                   | A/G | G | BMI            | 0.368 | -0.031  | 0.621 | 1.04 | 0.802 | 0.97 | 0.723 | 0.97 | 0.820 | 0.98 | 0.732 | -0.049 |
| rs10968576 | BMI                   | A/G | G | BMI            | 0.311 | 0.028   | 0.360 | 1.07 | 0.580 | 1.05 | 0.770 | 1.02 | 0.170 | 1.09 | 0.993 | 0.001  |
| rs4929949  | BMI                   | G/A | G | BMI            | 0.461 | 0.019   | 0.039 | 1.14 | 0.083 | 1.14 | 0.937 | 0.99 | 0.856 | 0.99 | 0.552 | -0.063 |
| rs10767664 | BMI                   | A/T | A | BMI            | 0.081 | 0.054   | 0.066 | 1.15 | 0.362 | 1.08 | 0.923 | 1.01 | 0.434 | 0.94 | 0.755 | -0.039 |
| rs3817334  | BMI                   | G/A | A | BMI            | 0.059 | 0.050   | 0.322 | 0.94 | 0.199 | 0.91 | 0.920 | 0.99 | 0.256 | 0.93 | 0.557 | 0.065  |
| rs7138803  | BMI                   | G/A | A | BMI            | 0.150 | 0.037   | 0.575 | 1.04 | 0.497 | 0.95 | 0.222 | 1.09 | 0.734 | 0.98 | 0.348 | 0.100  |
| rs4771122  | BMI                   | A/G | G | BMI            | 0.935 | -0.002  | 0.234 | 0.92 | 0.264 | 0.91 | 0.916 | 0.99 | 0.815 | 0.98 | 0.570 | -0.069 |
| rs11847697 | BMI                   | G/A | A | BMI            | 0.262 | 0.069   | 0.969 | 0.99 | 0.793 | 1.05 | 0.896 | 0.98 | 0.566 | 1.09 | 0.895 | 0.033  |
| rs10150332 | BMI                   | T/C | C | BMI            | 0.696 | -0.012  | 0.972 | 1.00 | 0.677 | 1.04 | 0.860 | 0.99 | 0.837 | 1.01 | 0.879 | 0.019  |
| rs2241423  | BMI                   | G/A | G | BMI            | 0.162 | 0.042   | 0.704 | 1.03 | 0.656 | 0.96 | 0.590 | 1.04 | 0.846 | 0.99 | 0.961 | 0.006  |

|            |     |     |   |                             |       |        |       |      |       |      |       |      |       |      |       |        |
|------------|-----|-----|---|-----------------------------|-------|--------|-------|------|-------|------|-------|------|-------|------|-------|--------|
| rs12444979 | BMI | G/A | G | BMI                         | 0.505 | -0.023 | 0.270 | 0.91 | 0.419 | 1.08 | 0.518 | 1.06 | 0.654 | 1.04 | 0.900 | 0.017  |
| rs7359397  | BMI | G/A | A | BMI                         | 0.056 | 0.051  | 0.230 | 0.92 | 0.686 | 0.97 | 0.044 | 0.87 | 0.568 | 0.96 | 0.220 | 0.135  |
| rs1558902  | BMI | A/T | T | BMI                         | 0.103 | 0.041  | 0.515 | 0.96 | 0.739 | 0.98 | 0.921 | 0.99 | 0.626 | 0.97 | 0.586 | 0.057  |
| rs571312   | BMI | C/A | A | BMI                         | 0.148 | 0.044  | 0.577 | 0.96 | 0.776 | 1.03 | 0.898 | 1.01 | 0.799 | 1.02 | 0.921 | -0.012 |
| rs29941    | BMI | G/A | G | BMI                         | 0.647 | -0.013 | 0.527 | 1.05 | 0.315 | 1.09 | 0.167 | 1.11 | 0.088 | 1.12 | 0.245 | -0.134 |
| rs2287019  | BMI | G/A | G | BMI                         | 0.234 | 0.040  | 0.247 | 1.10 | 0.407 | 1.08 | 0.684 | 1.04 | 0.979 | 1.00 | 0.159 | 0.196  |
| rs3810291  | BMI | A/G | A | BMI                         | 0.713 | -0.010 | 0.046 | 0.87 | 0.472 | 1.06 | 0.246 | 0.92 | 0.236 | 0.93 | 0.288 | 0.120  |
| rs9349379  | CAC | A/G | G | CAC                         | 0.067 | 0.202  | 0.172 | 0.91 | 0.285 | 0.92 | 0.882 | 0.99 | 0.329 | 0.94 | 0.067 | 0.202  |
| rs1333049  | CAC | C/G | G | CAC                         | 0.150 | 0.154  | 0.935 | 1.01 | 0.780 | 1.02 | 0.143 | 0.90 | 0.058 | 0.89 | 0.150 | 0.154  |
| rs11206510 | CAD | A/G | A | Self-reported history of MI | 0.964 | 1.00   | 0.980 | 1.00 | 0.205 | 0.89 | 0.964 | 1.00 | 0.952 | 1.00 | 0.410 | -0.105 |
| rs17114036 | CAD | A/G | A | Self-reported history of MI | 0.010 | 0.72   | 0.474 | 0.92 | 0.729 | 0.95 | 0.010 | 0.72 | 0.009 | 0.75 | 0.516 | 0.124  |
| rs17465637 | CAD | C/A | C | Self-reported history of MI | 0.089 | 0.88   | 0.133 | 0.90 | 0.287 | 0.92 | 0.089 | 0.88 | 0.518 | 0.96 | 0.305 | 0.120  |
| rs599839   | CAD | A/G | A | Self-reported history of MI | 0.700 | 0.97   | 0.651 | 1.04 | 0.357 | 1.09 | 0.700 | 0.97 | 0.455 | 0.95 | 0.042 | 0.259  |
| rs6725887  | CAD | T/C | C | Self-reported history of MI | 0.084 | 0.85   | 0.062 | 1.19 | 0.253 | 1.13 | 0.084 | 0.85 | 0.796 | 0.98 | 0.350 | -0.141 |
| rs9818870  | CAD | C/T | T | Self-reported history of MI | 0.819 | 1.02   | 0.853 | 1.02 | 0.287 | 1.12 | 0.819 | 1.02 | 0.890 | 1.01 | 0.735 | -0.048 |
| rs12526453 | CAD | C/G | C | Self-reported history of MI | 0.431 | 0.94   | 0.909 | 1.01 | 0.316 | 0.92 | 0.431 | 0.94 | 0.160 | 0.91 | 0.392 | 0.097  |
| rs3869109  | CAD | G/A | G | Self-reported history of MI | 0.924 | 1.01   | 0.684 | 1.03 | 0.565 | 1.04 | 0.924 | 1.01 | 0.087 | 1.11 | 0.829 | 0.023  |
| rs17609940 | CAD | G/C | G | Self-reported history of MI | 0.808 | 1.02   | 0.274 | 0.92 | 0.030 | 0.82 | 0.808 | 1.02 | 0.835 | 1.02 | 0.274 | 0.140  |
| rs6922269  | CAD | G/A | A | Self-reported history of MI | 0.768 | 1.02   | 0.058 | 1.15 | 0.125 | 1.14 | 0.768 | 1.02 | 0.982 | 1.00 | 0.091 | -0.201 |
| rs3798220  | CAD | A/G | G | Self-reported history of MI | 0.119 | 0.69   | 0.763 | 1.07 | 0.500 | 1.22 | 0.119 | 0.69 | 0.103 | 0.69 | 0.260 | 0.453  |
| rs10953541 | CAD | G/A | G | Self-reported history of MI | 0.814 | 0.98   | 0.912 | 0.99 | 0.740 | 1.03 | 0.814 | 0.98 | 0.748 | 0.98 | 0.594 | 0.066  |
| rs11556924 | CAD | C/T | C | Self-reported history of MI | 0.237 | 0.92   | 0.887 | 0.99 | 0.761 | 1.02 | 0.237 | 0.92 | 0.431 | 0.95 | 0.125 | 0.164  |
| rs7865618  | CAD | A/G | A | Self-reported history of MI | 0.951 | 1.00   | 0.142 | 0.91 | 0.810 | 0.98 | 0.951 | 1.00 | 0.159 | 0.92 | 0.170 | 0.144  |
| rs579459   | CAD | A/G | G | Self-reported history of MI | 0.102 | 0.87   | 0.370 | 0.93 | 0.255 | 0.90 | 0.102 | 0.87 | 0.408 | 0.94 | 0.229 | 0.162  |
| rs2505083  | CAD | A/G | G | Self-reported history of MI | 0.647 | 1.03   | 0.334 | 0.94 | 0.233 | 0.91 | 0.647 | 1.03 | 0.214 | 1.08 | 0.205 | 0.135  |
| rs1746048  | CAD | C/T | C | Self-reported history of MI | 0.810 | 0.98   | 0.051 | 0.82 | 0.045 | 0.78 | 0.810 | 0.98 | 0.530 | 1.06 | 0.860 | 0.028  |
| rs1412444  | CAD | G/A | A | Self-reported history of MI | 0.831 | 0.98   | 0.358 | 1.06 | 0.408 | 1.07 | 0.831 | 0.98 | 0.769 | 0.98 | 0.971 | -0.004 |
| rs12413409 | CAD | G/A | G | Self-reported history of MI | 0.771 | 1.04   | 0.078 | 0.81 | 0.522 | 0.91 | 0.771 | 1.04 | 0.619 | 1.05 | 0.426 | 0.150  |
| rs974819   | CAD | G/A | A | Self-reported history of MI | 0.317 | 1.08   | 0.252 | 0.92 | 0.615 | 0.96 | 0.317 | 1.08 | 0.057 | 1.14 | 0.823 | -0.026 |
| rs964184   | CAD | G/C | C | Self-reported history of MI | 0.799 | 1.02   | 0.747 | 0.97 | 0.375 | 0.91 | 0.799 | 1.02 | 0.503 | 1.06 | 0.835 | 0.031  |
| rs4773144  | CAD | A/G | G | Self-reported history of MI | 0.089 | 0.89   | 0.007 | 0.84 | 0.004 | 0.81 | 0.089 | 0.89 | 0.021 | 0.87 | 0.941 | 0.008  |
| rs2895811  | CAD | A/G | G | Self-reported history of MI | 0.163 | 0.91   | 0.652 | 0.97 | 0.653 | 0.97 | 0.163 | 0.91 | 0.609 | 1.03 | 0.011 | 0.276  |
| rs3825807  | CAD | A/G | A | Self-reported history of MI | 0.147 | 0.91   | 0.390 | 1.05 | 0.808 | 1.02 | 0.147 | 0.91 | 0.270 | 0.94 | 0.076 | 0.183  |
| rs216172   | CAD | G/C | C | Self-reported history of MI | 0.203 | 0.92   | 0.563 | 1.04 | 0.770 | 1.02 | 0.203 | 0.92 | 0.271 | 1.07 | 0.545 | 0.064  |





|            |                          |     |   |              |       |         |       |      |       |      |       |      |       |      |       |        |
|------------|--------------------------|-----|---|--------------|-------|---------|-------|------|-------|------|-------|------|-------|------|-------|--------|
| rs3807989  | Electrocardiogram traits | G/A | A | PR interval  | 0.009 | 0.021   | 0.370 | 1.06 | 0.989 | 1.00 | 0.988 | 1.00 | 0.411 | 0.95 | 0.222 | 0.134  |
| rs3807989  | Electrocardiogram traits | G/A | A | QRS interval | 0.454 | 0.006   |       |      |       |      |       |      |       |      |       |        |
| rs3807989  | Electrocardiogram traits | G/A | A | QT interval  | 0.922 | 0.0004  |       |      |       |      |       |      |       |      |       |        |
| rs3807375  | Electrocardiogram traits | G/A | A | PR interval  | 0.853 | -0.001  | 0.884 | 1.01 | 0.867 | 0.99 | 0.886 | 1.01 | 0.477 | 0.96 | 0.154 | 0.152  |
| rs3807375  | Electrocardiogram traits | G/A | A | QRS interval | 0.674 | 0.003   |       |      |       |      |       |      |       |      |       |        |
| rs3807375  | Electrocardiogram traits | G/A | A | QT interval  | 0.078 | 0.007   |       |      |       |      |       |      |       |      |       |        |
| rs2074238  | Electrocardiogram traits | G/A | G | PR interval  | 0.588 | 0.009   | 0.544 | 1.08 | 0.389 | 1.14 | 0.858 | 0.98 | 0.220 | 1.16 | 0.504 | -0.144 |
| rs2074238  | Electrocardiogram traits | G/A | G | QRS interval | 0.140 | -0.023  |       |      |       |      |       |      |       |      |       |        |
| rs2074238  | Electrocardiogram traits | G/A | G | QT interval  | 0.539 | 0.005   |       |      |       |      |       |      |       |      |       |        |
| rs12576239 | Electrocardiogram traits | G/A | A | PR interval  | 0.502 | -0.008  | 0.784 | 1.03 | 0.827 | 1.02 | 0.247 | 1.12 | 0.355 | 1.08 | 0.906 | -0.018 |
| rs12576239 | Electrocardiogram traits | G/A | A | QRS interval | 0.721 | 0.004   |       |      |       |      |       |      |       |      |       |        |
| rs12576239 | Electrocardiogram traits | G/A | A | QT interval  | 0.470 | 0.004   |       |      |       |      |       |      |       |      |       |        |
| rs3825214  | Electrocardiogram traits | A/G | G | PR interval  | 0.184 | 0.014   | 0.286 | 0.91 | 0.024 | 0.80 | 0.214 | 0.90 | 0.689 | 0.97 | 0.412 | 0.115  |
| rs3825214  | Electrocardiogram traits | A/G | G | QRS interval | 0.027 | 0.023   |       |      |       |      |       |      |       |      |       |        |
| rs3825214  | Electrocardiogram traits | A/G | G | QT interval  | 0.946 | -0.0004 |       |      |       |      |       |      |       |      |       |        |
| rs2478333  | Electrocardiogram traits | C/A | A | PR interval  | 0.929 | 0.001   | 0.815 | 1.02 | 0.703 | 1.03 | 0.824 | 0.98 | 0.793 | 1.02 | 0.998 | 0.000  |
| rs2478333  | Electrocardiogram traits | C/A | A | QRS interval | 0.187 | 0.011   |       |      |       |      |       |      |       |      |       |        |
| rs2478333  | Electrocardiogram traits | C/A | A | QT interval  | 0.549 | 0.002   |       |      |       |      |       |      |       |      |       |        |
| rs365990   | Electrocardiogram traits | A/G | G | PR interval  | 0.647 | -0.004  | 0.930 | 0.99 | 0.592 | 1.04 | 0.950 | 1.00 | 0.801 | 1.02 | 0.564 | 0.064  |
| rs365990   | Electrocardiogram traits | A/G | G | QRS interval | 0.465 | -0.006  |       |      |       |      |       |      |       |      |       |        |
| rs365990   | Electrocardiogram traits | A/G | G | QT interval  | 0.297 | -0.004  |       |      |       |      |       |      |       |      |       |        |
| rs8049607  | Electrocardiogram traits | G/A | A | PR interval  | 0.460 | -0.006  | 0.324 | 0.94 | 0.592 | 0.96 | 0.345 | 1.07 | 0.209 | 1.08 | 0.109 | -0.169 |

|            |                          |     |   |                 |       |        |       |      |       |      |       |      |       |      |       |        |  |
|------------|--------------------------|-----|---|-----------------|-------|--------|-------|------|-------|------|-------|------|-------|------|-------|--------|--|
| rs8049607  | Electrocardiogram traits | G/A | A | QRS interval    | 0.907 | -0.001 |       |      |       |      |       |      |       |      |       |        |  |
| rs8049607  | Electrocardiogram traits | G/A | A | QT interval     | 0.101 | 0.006  |       |      |       |      |       |      |       |      |       |        |  |
| rs7188697  | Electrocardiogram traits | A/G | A | PR interval     | 0.269 | -0.010 | 0.726 | 1.03 | 0.506 | 1.06 | 0.653 | 0.97 | 0.382 | 1.06 | 0.240 | 0.142  |  |
| rs7188697  | Electrocardiogram traits | A/G | A | QRS interval    | 0.604 | 0.005  |       |      |       |      |       |      |       |      |       |        |  |
| rs7188697  | Electrocardiogram traits | A/G | A | QT interval     | 0.512 | 0.003  |       |      |       |      |       |      |       |      |       |        |  |
| rs2074518  | Electrocardiogram traits | G/A | G | PR interval     | 0.419 | 0.006  | 0.158 | 0.92 | 0.181 | 0.91 | 0.603 | 0.97 | 0.787 | 1.02 | 0.890 | 0.014  |  |
| rs2074518  | Electrocardiogram traits | G/A | G | QRS interval    | 0.068 | 0.014  |       |      |       |      |       |      |       |      |       |        |  |
| rs2074518  | Electrocardiogram traits | G/A | G | QT interval     | 0.013 | 0.010  |       |      |       |      |       |      |       |      |       |        |  |
| rs17779747 | Electrocardiogram traits | C/A | C | PR interval     | 0.029 | 0.018  | 0.217 | 0.92 | 0.519 | 0.95 | 0.512 | 0.95 | 0.422 | 0.95 | 0.968 | 0.005  |  |
| rs17779747 | Electrocardiogram traits | C/A | C | QRS interval    | 0.355 | 0.008  |       |      |       |      |       |      |       |      |       |        |  |
| rs17779747 | Electrocardiogram traits | C/A | C | QT interval     | 0.920 | 0.0004 |       |      |       |      |       |      |       |      |       |        |  |
| rs727957   | Electrocardiogram traits | C/A | A | PR interval     | 0.348 | -0.010 | 0.997 | 1.00 | 0.746 | 1.03 | 0.598 | 0.95 | 0.104 | 0.88 | 0.342 | -0.131 |  |
| rs727957   | Electrocardiogram traits | C/A | A | QRS interval    | 0.740 | 0.003  |       |      |       |      |       |      |       |      |       |        |  |
| rs727957   | Electrocardiogram traits | C/A | A | QT interval     | 0.202 | 0.007  |       |      |       |      |       |      |       |      |       |        |  |
| rs340874   | Fasting glucose          | G/A | G | Fasting glucose | 0.670 | -0.007 | 0.735 | 0.98 | 0.904 | 0.99 | 0.526 | 1.04 | 0.170 | 1.09 | 0.750 | -0.035 |  |
| rs780094   | Fasting glucose          | G/A | G | Fasting glucose | 0.339 | 0.015  | 0.801 | 0.98 | 0.212 | 0.91 | 0.041 | 0.87 | 0.385 | 0.95 | 0.718 | -0.039 |  |
| rs560887   | Fasting glucose          | G/A | G | Fasting glucose | 0.280 | -0.018 | 0.502 | 0.96 | 0.827 | 0.98 | 0.611 | 0.96 | 0.420 | 0.95 | 0.774 | 0.032  |  |
| rs11708067 | Fasting glucose          | A/G | A | Fasting glucose | 0.983 | 0.0004 | 0.027 | 1.17 | 0.228 | 1.11 | 0.246 | 1.09 | 0.130 | 1.11 | 0.445 | -0.092 |  |
| rs11920090 | Fasting glucose          | T/A | T | Fasting glucose | 0.730 | 0.008  | 0.234 | 0.89 | 0.710 | 0.96 | 0.828 | 0.98 | 0.622 | 1.05 | 0.893 | -0.021 |  |
| rs2191349  | Fasting glucose          | A/C | A | Fasting glucose | 0.589 | 0.009  | 0.852 | 1.01 | 0.844 | 1.02 | 0.145 | 0.90 | 0.936 | 1.00 | 0.536 | -0.067 |  |
| rs4607517  | Fasting glucose          | G/A | A | Fasting glucose | 0.980 | 0.001  | 0.974 | 1.00 | 0.371 | 1.09 | 0.914 | 0.99 | 0.871 | 1.01 | 0.306 | 0.138  |  |
| rs11558471 | Fasting glucose          | A/G | A | Fasting glucose | 0.838 | 0.004  | 0.040 | 1.15 | 0.079 | 1.15 | 0.132 | 1.12 | 0.503 | 1.05 | 0.566 | 0.067  |  |
| rs7034200  | Fasting glucose          | C/A | A | Fasting glucose | 0.930 | 0.001  | 0.952 | 1.00 | 0.904 | 0.99 | 0.080 | 0.89 | 0.356 | 0.95 | 0.400 | -0.086 |  |
| rs10885122 | Fasting glucose          | C/A | C | Fasting glucose | 0.923 | 0.002  | 0.430 | 0.93 | 0.178 | 0.86 | 0.305 | 1.11 | 0.867 | 0.99 | 0.239 | 0.187  |  |
| rs4506565  | Fasting glucose          | A/T | T | Fasting glucose | 0.460 | 0.012  | 0.871 | 0.99 | 0.321 | 0.93 | 0.749 | 0.98 | 0.172 | 0.92 | 0.408 | 0.087  |  |
| rs11605924 | Fasting glucose          | C/A | A | Fasting glucose | 0.767 | -0.005 | 0.336 | 1.06 | 0.658 | 1.03 | 0.860 | 0.99 | 0.678 | 0.98 | 0.334 | -0.100 |  |
| rs7944584  | Fasting glucose          | A/T | A | Fasting glucose | 0.746 | 0.006  | 0.229 | 0.92 | 0.663 | 0.96 | 0.388 | 1.07 | 0.778 | 1.02 | 0.610 | 0.060  |  |

|            |                 |     |   |                 |       |         |       |      |       |      |       |      |       |      |       |        |
|------------|-----------------|-----|---|-----------------|-------|---------|-------|------|-------|------|-------|------|-------|------|-------|--------|
| rs174550   | Fasting glucose | A/G | A | Fasting glucose | 0.644 | 0.008   | 0.316 | 1.07 | 0.712 | 1.03 | 0.306 | 1.08 | 0.717 | 0.98 | 0.771 | 0.033  |
| rs10830963 | Fasting glucose | C/G | G | Fasting glucose | 0.739 | -0.006  | 0.459 | 1.05 | 0.069 | 1.16 | 0.460 | 1.06 | 0.489 | 1.05 | 0.654 | 0.052  |
| rs11071657 | Fasting glucose | A/G | A | Fasting glucose | 0.976 | -0.0005 | 0.541 | 1.04 | 0.819 | 0.98 | 0.393 | 1.06 | 0.972 | 1.00 | 0.185 | -0.140 |
| rs267734   | eGFR            | A/G | A | eGFR            | 0.309 | -0.957  | 0.843 | 0.98 | 0.957 | 1.01 | 0.262 | 0.91 | 0.313 | 0.93 | 0.758 | -0.040 |
| rs1260326  | eGFR            | G/A | G | eGFR            | 0.398 | 0.648   | 0.672 | 1.03 | 0.423 | 0.94 | 0.101 | 0.90 | 0.605 | 0.97 | 0.514 | -0.069 |
| rs10206899 | eGFR            | A/G | A | eGFR            | 0.652 | 0.408   | 0.962 | 1.00 | 0.831 | 1.02 | 0.111 | 0.88 | 0.803 | 0.98 | 0.012 | 0.314  |
| rs347685   | eGFR            | A/C | A | eGFR            | 0.947 | -0.056  | 0.279 | 1.08 | 0.476 | 1.06 | 0.909 | 1.01 | 0.580 | 1.04 | 0.037 | 0.243  |
| rs10032549 | eGFR            | G/A | G | eGFR            | 0.911 | 0.087   | 0.202 | 1.09 | 0.178 | 1.11 | 0.712 | 1.03 | 0.788 | 0.98 | 0.246 | -0.126 |
| rs6420094  | eGFR            | A/G | G | eGFR            | 0.549 | 0.474   | 0.705 | 1.03 | 0.232 | 1.10 | 0.651 | 1.03 | 0.341 | 1.06 | 0.739 | -0.037 |
| rs881858   | eGFR            | A/G | A | eGFR            | 0.002 | -2.560  | 0.626 | 0.97 | 0.213 | 0.90 | 0.596 | 0.96 | 0.588 | 0.96 | 0.133 | 0.174  |
| rs2279463  | eGFR            | A/G | G | eGFR            | 0.092 | -1.810  | 0.958 | 1.00 | 0.614 | 1.05 | 0.597 | 1.05 | 0.076 | 0.86 | 0.518 | 0.095  |
| rs6465825  | eGFR            | A/G | G | eGFR            | 0.652 | -0.345  | 0.463 | 0.95 | 0.330 | 1.08 | 0.877 | 0.99 | 0.806 | 0.99 | 0.246 | 0.123  |
| rs10109414 | eGFR            | G/A | A | eGFR            | 0.902 | -0.094  | 0.108 | 0.90 | 0.118 | 0.89 | 0.214 | 0.92 | 0.324 | 0.94 | 0.168 | 0.148  |
| rs4744712  | eGFR            | C/A | A | eGFR            | 0.581 | 0.430   | 0.561 | 0.96 | 0.520 | 0.95 | 0.553 | 0.96 | 0.711 | 1.02 | 0.929 | 0.010  |
| rs10794720 | eGFR            | G/A | A | eGFR            | 0.295 | -1.576  | 0.553 | 0.93 | 0.565 | 0.92 | 0.140 | 0.82 | 0.100 | 0.82 | 0.512 | -0.136 |
| rs3925584  | eGFR            | A/G | A | eGFR            | 0.245 | -0.895  | 0.842 | 1.01 | 0.345 | 0.93 | 0.341 | 0.94 | 0.378 | 0.95 | 0.448 | 0.080  |
| rs10774021 | eGFR            | A/G | A | eGFR            | 0.773 | 0.231   | 0.980 | 1.00 | 0.590 | 0.96 | 0.724 | 0.98 | 0.699 | 1.02 | 0.144 | 0.161  |
| rs653178   | eGFR            | A/G | G | eGFR            | 0.311 | -0.749  | 0.447 | 1.05 | 0.570 | 0.96 | 0.095 | 0.90 | 0.167 | 0.92 | 0.062 | -0.192 |
| rs626277   | eGFR            | A/C | A | eGFR            | 0.294 | -0.819  | 0.595 | 1.04 | 0.997 | 1.00 | 0.623 | 1.03 | 0.710 | 1.02 | 0.156 | -0.154 |
| rs17536527 | eGFR            | G/C | C | eGFR            | 0.675 | -0.330  | 0.682 | 1.03 | 0.534 | 0.95 | 0.015 | 0.84 | 0.337 | 0.94 | 0.392 | -0.094 |
| rs491567   | eGFR            | A/C | A | eGFR            | 0.005 | -2.528  | 0.379 | 1.07 | 0.389 | 1.08 | 0.415 | 0.94 | 0.811 | 0.98 | 0.201 | -0.158 |
| rs1394125  | eGFR            | G/A | A | eGFR            | 0.191 | 1.077   | 0.444 | 0.95 | 0.845 | 1.02 | 0.795 | 0.98 | 0.663 | 1.03 | 0.041 | 0.232  |
| rs12917707 | eGFR            | C/A | C | eGFR            | 0.360 | -0.897  | 0.167 | 1.12 | 0.262 | 1.11 | 0.448 | 1.07 | 0.862 | 0.99 | 0.110 | -0.217 |
| rs9895661  | eGFR            | A/G | G | eGFR            | 1.000 | 0.001   | 0.321 | 0.92 | 0.567 | 0.95 | 0.347 | 1.09 | 0.588 | 1.04 | 0.555 | 0.084  |
| rs12460876 | eGFR            | A/G | A | eGFR            | 0.242 | -0.934  | 0.544 | 0.96 | 0.497 | 0.95 | 0.652 | 1.03 | 0.141 | 1.10 | 0.434 | -0.085 |
| rs911119   | eGFR            | A/G | A | eGFR            | 0.326 | -0.908  | 0.092 | 1.14 | 0.093 | 1.16 | 0.301 | 1.09 | 0.469 | 1.05 | 0.084 | -0.219 |
| rs4660293  | HDL cholesterol | A/G | G | HDL cholesterol | 0.087 | 0.078   | 0.481 | 1.05 | 0.135 | 1.14 | 0.785 | 1.02 | 0.361 | 1.06 | 0.646 | 0.056  |
| rs4846914  | HDL cholesterol | A/G | G | HDL cholesterol | 0.318 | -0.041  | 0.619 | 1.03 | 0.799 | 0.98 | 0.539 | 0.96 | 0.891 | 1.01 | 0.070 | 0.198  |
| rs6754295  | HDL cholesterol | A/C | A | HDL cholesterol | 0.117 | -0.071  | 0.181 | 0.91 | 0.409 | 0.93 | 0.980 | 1.00 | 0.380 | 0.94 | 0.725 | 0.042  |
| rs12328675 | HDL cholesterol | A/G | A | HDL cholesterol | 0.058 | 0.114   | 0.083 | 1.18 | 0.043 | 1.24 | 0.362 | 1.09 | 0.769 | 1.03 | 0.748 | 0.051  |
| rs2972146  | HDL cholesterol | A/C | A | HDL cholesterol | 0.470 | 0.030   | 0.871 | 0.99 | 0.314 | 1.08 | 0.099 | 1.12 | 0.031 | 1.15 | 0.733 | -0.038 |
| rs6450176  | HDL cholesterol | G/A | A | HDL cholesterol | 0.467 | 0.033   | 0.905 | 1.01 | 0.773 | 1.02 | 0.302 | 1.08 | 0.468 | 1.05 | 0.660 | -0.052 |
| rs2814944  | HDL cholesterol | G/A | A | HDL cholesterol | 0.678 | 0.022   | 0.874 | 0.99 | 0.567 | 0.95 | 0.438 | 0.93 | 0.502 | 0.95 | 0.723 | -0.050 |
| rs605066   | HDL cholesterol | A/G | G | HDL cholesterol | 0.819 | -0.009  | 0.447 | 0.95 | 0.877 | 1.01 | 0.534 | 0.96 | 0.057 | 0.89 | 0.807 | 0.027  |



|            |                 |     |   |                 |        |        |       |      |       |      |       |      |       |      |       |        |
|------------|-----------------|-----|---|-----------------|--------|--------|-------|------|-------|------|-------|------|-------|------|-------|--------|
| rs1084651  | HDL cholesterol | G/A | A | HDL cholesterol | 0.129  | -0.083 | 0.209 | 0.90 | 0.110 | 0.85 | 0.511 | 1.06 | 0.261 | 0.91 | 0.152 | 0.210  |
| rs17145738 | HDL cholesterol | C/T | C | HDL cholesterol | 0.666  | -0.026 | 0.728 | 0.97 | 0.242 | 0.87 | 0.336 | 0.91 | 0.633 | 1.04 | 0.911 | 0.017  |
| rs4731702  | HDL cholesterol | G/A | G | HDL cholesterol | 0.901  | -0.005 | 0.794 | 0.98 | 0.160 | 0.90 | 0.412 | 0.95 | 0.486 | 0.96 | 0.438 | 0.079  |
| rs9987289  | HDL cholesterol | G/A | A | HDL cholesterol | 0.507  | -0.042 | 0.700 | 0.96 | 0.792 | 1.03 | 0.436 | 0.92 | 0.235 | 0.89 | 0.750 | -0.055 |
| rs12678919 | HDL cholesterol | A/G | A | HDL cholesterol | 0.302  | -0.072 | 0.987 | 1.00 | 0.830 | 1.03 | 0.774 | 0.97 | 0.669 | 1.05 | 0.039 | 0.378  |
| rs2954029  | HDL cholesterol | A/T | A | HDL cholesterol | 0.295  | 0.042  | 0.010 | 1.18 | 0.172 | 1.11 | 0.105 | 0.89 | 0.193 | 0.92 | 0.832 | 0.023  |
| rs471364   | HDL cholesterol | T/C | C | HDL cholesterol | 0.604  | -0.033 | 0.531 | 0.94 | 0.570 | 0.94 | 0.456 | 1.09 | 0.171 | 0.88 | 0.522 | 0.107  |
| rs1883025  | HDL cholesterol | G/A | A | HDL cholesterol | 0.197  | -0.058 | 0.162 | 1.11 | 0.549 | 1.05 | 0.172 | 1.11 | 0.300 | 0.93 | 0.181 | -0.159 |
| rs3136441  | HDL cholesterol | A/G | A | HDL cholesterol | 0.825  | 0.013  | 0.122 | 1.16 | 0.992 | 1.00 | 0.821 | 0.98 | 0.157 | 0.88 | 0.477 | -0.111 |
| rs7120118  | HDL cholesterol | A/G | A | HDL cholesterol | 0.198  | -0.056 | 0.652 | 1.03 | 0.496 | 0.95 | 0.422 | 0.94 | 0.784 | 0.98 | 0.189 | -0.151 |
| rs7395662  | HDL cholesterol | G/A | G | HDL cholesterol | 0.488  | -0.029 | 0.848 | 0.99 | 0.744 | 1.03 | 0.179 | 1.10 | 0.797 | 0.98 | 0.805 | -0.028 |
| rs174546   | HDL cholesterol | G/A | A | HDL cholesterol | 0.066  | -0.077 | 0.316 | 0.93 | 0.712 | 0.97 | 0.306 | 0.93 | 0.717 | 1.02 | 0.771 | -0.033 |
| rs964184   | HDL cholesterol | G/C | C | HDL cholesterol | 0.172  | -0.076 | 0.747 | 0.97 | 0.375 | 0.91 | 0.799 | 1.02 | 0.503 | 1.06 | 0.835 | 0.031  |
| rs7941030  | HDL cholesterol | A/G | A | HDL cholesterol | 0.537  | -0.025 | 0.458 | 1.05 | 0.900 | 0.99 | 0.915 | 0.99 | 0.386 | 1.05 | 0.426 | -0.087 |
| rs7134375  | HDL cholesterol | C/A | C | HDL cholesterol | 0.042  | -0.083 | 0.677 | 1.03 | 0.932 | 0.99 | 0.239 | 0.92 | 0.568 | 0.97 | 0.337 | 0.105  |
| rs11613352 | HDL cholesterol | C/T | C | HDL cholesterol | 0.059  | -0.085 | 0.220 | 1.09 | 0.257 | 1.10 | 0.141 | 1.12 | 0.647 | 0.97 | 0.476 | 0.085  |
| rs2338104  | HDL cholesterol | G/C | C | HDL cholesterol | 0.449  | 0.031  | 0.726 | 1.02 | 0.563 | 1.04 | 0.001 | 1.25 | 0.010 | 1.17 | 0.178 | -0.148 |
| rs4765127  | HDL cholesterol | C/A | C | HDL cholesterol | 0.562  | -0.024 | 0.157 | 0.91 | 0.307 | 0.92 | 0.111 | 0.89 | 0.695 | 0.98 | 0.120 | 0.170  |
| rs1532085  | HDL cholesterol | G/A | G | HDL cholesterol | 0.002  | -0.128 | 0.525 | 1.04 | 0.900 | 0.99 | 0.348 | 0.94 | 0.595 | 0.97 | 0.490 | -0.076 |
| rs2652834  | HDL cholesterol | G/A | A | HDL cholesterol | 0.015  | -0.123 | 0.951 | 1.00 | 0.871 | 1.02 | 0.472 | 0.94 | 0.603 | 0.96 | 0.511 | 0.089  |
| rs3764261  | HDL cholesterol | C/A | C | HDL cholesterol | 0.0001 | -0.168 | 0.605 | 0.97 | 0.456 | 0.94 | 0.073 | 0.88 | 0.168 | 0.92 | 0.046 | 0.222  |
| rs2271293  | HDL cholesterol | G/A | G | HDL cholesterol | 0.172  | -0.085 | 0.262 | 0.89 | 0.860 | 0.98 | 0.477 | 1.08 | 0.131 | 1.15 | 0.633 | -0.079 |
| rs2925979  | HDL cholesterol | G/A | A | HDL cholesterol | 0.119  | -0.066 | 0.080 | 1.13 | 0.150 | 1.12 | 0.545 | 0.96 | 0.435 | 0.95 | 0.406 | 0.093  |
| rs11869286 | HDL cholesterol | G/C | C | HDL cholesterol | 0.500  | -0.028 | 0.736 | 1.02 | 0.689 | 0.97 | 0.595 | 1.04 | 0.867 | 0.99 | 0.007 | 0.292  |
| rs4148008  | HDL cholesterol | C/G | G | HDL cholesterol | 0.123  | 0.066  | 0.024 | 1.17 | 0.135 | 1.13 | 0.681 | 0.97 | 0.925 | 0.99 | 0.568 | -0.065 |
| rs4129767  | HDL cholesterol | G/A | G | HDL cholesterol | 0.210  | -0.050 | 0.528 | 0.96 | 0.879 | 0.99 | 0.070 | 1.13 | 0.684 | 1.03 | 0.743 | 0.035  |
| rs4939883  | HDL cholesterol | C/T | T | HDL cholesterol | 0.085  | -0.088 | 0.988 | 1.00 | 0.661 | 1.04 | 0.996 | 1.00 | 0.528 | 1.05 | 0.328 | -0.133 |
| rs12967135 | HDL cholesterol | G/A | A | HDL cholesterol | 0.193  | -0.062 | 0.731 | 0.97 | 0.831 | 1.02 | 0.544 | 1.05 | 0.600 | 1.04 | 0.470 | -0.091 |
| rs2967605  | HDL cholesterol | G/A | A | HDL cholesterol | 0.207  | 0.064  | 0.819 | 0.98 | 0.791 | 1.03 | 0.425 | 0.93 | 0.632 | 1.04 | 0.027 | 0.302  |
| rs4420638  | HDL cholesterol | T/C | C | HDL cholesterol | 0.072  | -0.096 | 0.222 | 1.11 | 0.205 | 1.14 | 0.109 | 1.16 | 0.124 | 1.13 | 0.242 | -0.167 |
| rs1800961  | HDL cholesterol | G/A | A | HDL cholesterol | 0.317  | 0.116  | 0.896 | 0.98 | 0.186 | 0.76 | 0.423 | 1.18 | 0.170 | 1.29 | 0.186 | -0.399 |
| rs7679     | HDL cholesterol | T/C | C | HDL cholesterol | 0.466  | -0.035 | 0.234 | 0.91 | 0.706 | 0.97 | 0.890 | 0.99 | 0.847 | 1.01 | 0.126 | 0.195  |
| rs12027135 | LDL cholesterol | A/T | A | LDL cholesterol | 0.919  | 0.161  | 0.626 | 0.97 | 0.333 | 1.08 | 0.663 | 0.97 | 0.571 | 0.97 | 0.098 | 0.178  |
| rs11206510 | LDL cholesterol | A/G | A | LDL cholesterol | 0.696  | -0.740 | 0.980 | 1.00 | 0.205 | 0.89 | 0.964 | 1.00 | 0.952 | 1.00 | 0.410 | -0.105 |

|            |                 |     |   |                 |       |        |       |      |       |      |       |      |       |      |       |        |
|------------|-----------------|-----|---|-----------------|-------|--------|-------|------|-------|------|-------|------|-------|------|-------|--------|
| rs2479409  | LDL cholesterol | A/G | G | LDL cholesterol | 0.071 | 2.911  | 0.718 | 0.98 | 0.266 | 0.92 | 0.323 | 1.07 | 0.561 | 1.04 | 0.873 | 0.017  |
| rs2131925  | LDL cholesterol | A/C | A | LDL cholesterol | 0.035 | 3.473  | 0.685 | 1.03 | 0.859 | 0.99 | 0.927 | 0.99 | 0.449 | 0.95 | 0.254 | 0.127  |
| rs12740374 | LDL cholesterol | C/A | C | LDL cholesterol | 0.134 | 2.792  | 0.507 | 1.05 | 0.245 | 1.11 | 0.546 | 0.95 | 0.501 | 0.95 | 0.045 | 0.254  |
| rs2642442  | LDL cholesterol | T/C | C | LDL cholesterol | 0.326 | -1.682 | 0.739 | 0.98 | 0.535 | 1.05 | 0.049 | 1.16 | 0.523 | 1.04 | 0.335 | 0.110  |
| rs514230   | LDL cholesterol | A/T | A | LDL cholesterol | 0.053 | 3.024  | 0.534 | 0.96 | 0.719 | 1.03 | 0.276 | 0.93 | 0.692 | 0.98 | 0.648 | -0.048 |
| rs515135   | LDL cholesterol | G/A | G | LDL cholesterol | 0.051 | 4.006  | 0.420 | 0.93 | 0.447 | 0.93 | 0.123 | 0.87 | 0.090 | 0.87 | 0.268 | 0.152  |
| rs6756629  | LDL cholesterol | G/A | G | LDL cholesterol | 0.864 | 0.526  | 0.476 | 1.09 | 0.427 | 0.89 | 0.348 | 0.88 | 0.295 | 0.88 | 0.789 | -0.055 |
| rs6544713  | LDL cholesterol | G/A | A | LDL cholesterol | 0.051 | 3.243  | 0.067 | 1.13 | 0.201 | 1.11 | 0.471 | 0.95 | 0.749 | 0.98 | 0.973 | 0.004  |
| rs3846663  | LDL cholesterol | C/T | T | LDL cholesterol | 0.018 | 3.957  | 0.779 | 1.02 | 0.691 | 0.97 | 0.237 | 1.09 | 0.894 | 0.99 | 0.840 | -0.023 |
| rs1501908  | LDL cholesterol | C/G | C | LDL cholesterol | 0.240 | -1.936 | 0.144 | 1.10 | 0.256 | 1.09 | 0.457 | 0.95 | 0.115 | 0.90 | 0.128 | 0.169  |
| rs3757354  | LDL cholesterol | G/A | G | LDL cholesterol | 0.796 | -0.507 | 0.131 | 1.13 | 0.647 | 1.04 | 0.714 | 0.97 | 0.733 | 0.97 | 0.865 | -0.022 |
| rs2142672  | LDL cholesterol | G/A | G | LDL cholesterol | 0.595 | 0.952  | 0.117 | 1.12 | 0.701 | 1.03 | 0.381 | 1.07 | 0.183 | 1.10 | 0.836 | -0.025 |
| rs1800562  | LDL cholesterol | G/A | G | LDL cholesterol | 0.243 | 3.478  | 0.871 | 1.02 | 0.023 | 1.34 | 0.955 | 1.01 | 0.634 | 0.95 | 0.401 | -0.164 |
| rs3177928  | LDL cholesterol | G/A | A | LDL cholesterol | 0.654 | 1.001  | 0.696 | 0.97 | 0.505 | 1.07 | 0.678 | 0.96 | 0.507 | 0.94 | 0.148 | -0.217 |
| rs2254287  | LDL cholesterol | C/G | G | LDL cholesterol | 0.940 | 0.118  | 0.595 | 0.97 | 0.108 | 0.89 | 0.921 | 0.99 | 0.298 | 1.07 | 0.571 | 0.059  |
| rs1564348  | LDL cholesterol | A/G | G | LDL cholesterol | 0.090 | 3.635  | 0.772 | 0.98 | 0.569 | 1.06 | 0.754 | 0.97 | 0.842 | 0.98 | 0.707 | 0.054  |
| rs12670798 | LDL cholesterol | A/G | G | LDL cholesterol | 0.092 | 3.160  | 0.742 | 0.98 | 0.815 | 1.02 | 0.882 | 0.99 | 0.517 | 1.05 | 0.324 | 0.122  |
| rs2072183  | LDL cholesterol | C/G | G | LDL cholesterol | 0.488 | 1.277  | 0.529 | 0.95 | 0.110 | 0.87 | 0.806 | 0.98 | 0.674 | 0.97 | 0.541 | 0.076  |
| rs9987289  | LDL cholesterol | G/A | G | LDL cholesterol | 0.031 | -5.424 | 0.700 | 1.04 | 0.792 | 0.97 | 0.436 | 1.09 | 0.235 | 1.12 | 0.750 | 0.055  |
| rs2081687  | LDL cholesterol | G/A | A | LDL cholesterol | 0.050 | 3.226  | 0.407 | 0.95 | 0.757 | 1.02 | 0.295 | 0.93 | 0.149 | 0.91 | 0.576 | 0.061  |
| rs2954029  | LDL cholesterol | A/T | A | LDL cholesterol | 0.098 | -2.665 | 0.010 | 1.18 | 0.172 | 1.11 | 0.105 | 0.89 | 0.193 | 0.92 | 0.832 | 0.023  |
| rs11136341 | LDL cholesterol | A/G | G | LDL cholesterol | 0.496 | -1.092 | 0.620 | 0.97 | 0.216 | 0.91 | 0.911 | 1.01 | 0.868 | 0.99 | 0.644 | 0.049  |
| rs635634   | LDL cholesterol | G/A | A | LDL cholesterol | 0.220 | 2.524  | 0.577 | 0.95 | 0.202 | 0.88 | 0.154 | 0.88 | 0.670 | 0.97 | 0.388 | 0.120  |
| rs2255141  | LDL cholesterol | G/A | A | LDL cholesterol | 0.786 | 0.475  | 0.726 | 0.98 | 0.878 | 1.01 | 0.995 | 1.00 | 0.667 | 1.03 | 0.196 | -0.151 |
| rs174546   | LDL cholesterol | G/A | G | LDL cholesterol | 0.250 | -1.909 | 0.316 | 1.07 | 0.712 | 1.03 | 0.306 | 1.08 | 0.717 | 0.98 | 0.771 | 0.033  |
| rs964184   | LDL cholesterol | G/C | C | LDL cholesterol | 0.012 | -5.658 | 0.747 | 0.97 | 0.375 | 0.91 | 0.799 | 1.02 | 0.503 | 1.06 | 0.835 | 0.031  |
| rs11220462 | LDL cholesterol | G/A | A | LDL cholesterol | 0.967 | -0.095 | 0.707 | 0.97 | 0.624 | 0.95 | 0.731 | 1.03 | 0.363 | 0.92 | 0.914 | -0.016 |
| rs11065987 | LDL cholesterol | A/G | A | LDL cholesterol | 0.144 | 2.230  | 0.447 | 0.95 | 0.705 | 1.03 | 0.056 | 1.13 | 0.086 | 1.11 | 0.085 | 0.179  |
| rs2650000  | LDL cholesterol | C/A | A | LDL cholesterol | 0.455 | 1.220  | 0.446 | 1.05 | 0.847 | 1.02 | 0.828 | 1.02 | 0.833 | 0.99 | 0.054 | 0.213  |
| rs8017377  | LDL cholesterol | G/A | A | LDL cholesterol | 0.789 | -0.413 | 0.695 | 0.98 | 0.540 | 0.96 | 0.626 | 1.03 | 0.949 | 1.00 | 0.822 | -0.024 |
| rs3764261  | LDL cholesterol | C/A | C | LDL cholesterol | 0.175 | 2.246  | 0.605 | 0.97 | 0.456 | 0.94 | 0.073 | 0.88 | 0.168 | 0.92 | 0.046 | 0.222  |
| rs2000999  | LDL cholesterol | G/A | A | LDL cholesterol | 0.324 | -1.925 | 0.183 | 1.11 | 0.023 | 1.25 | 0.049 | 0.85 | 0.119 | 0.89 | 0.566 | -0.075 |
| rs7206971  | LDL cholesterol | G/A | G | LDL cholesterol | 0.206 | -2.022 | 0.030 | 0.87 | 0.033 | 0.85 | 0.798 | 1.02 | 0.296 | 1.07 | 0.144 | -0.156 |
| rs6511720  | LDL cholesterol | C/A | C | LDL cholesterol | 0.045 | 4.335  | 0.044 | 0.83 | 0.339 | 0.90 | 0.861 | 0.98 | 0.443 | 1.07 | 0.482 | -0.103 |

|            |                 |     |   |                                 |       |        |       |      |       |      |       |      |       |      |       |        |
|------------|-----------------|-----|---|---------------------------------|-------|--------|-------|------|-------|------|-------|------|-------|------|-------|--------|
| rs10401969 | LDL cholesterol | A/G | A | LDL cholesterol                 | 0.743 | 0.811  | 0.414 | 1.09 | 0.808 | 0.97 | 0.562 | 1.06 | 0.928 | 0.99 | 0.680 | 0.068  |
| rs4420638  | LDL cholesterol | T/C | C | LDL cholesterol                 | 0.042 | 4.288  | 0.222 | 1.11 | 0.205 | 1.14 | 0.109 | 1.16 | 0.124 | 1.13 | 0.242 | -0.167 |
| rs2902940  | LDL cholesterol | A/G | A | LDL cholesterol                 | 0.858 | -0.295 | 0.268 | 1.08 | 0.224 | 1.10 | 0.799 | 0.98 | 0.240 | 0.93 | 0.462 | -0.081 |
| rs6102059  | LDL cholesterol | C/T | C | LDL cholesterol                 | 0.544 | -1.052 | 0.401 | 1.06 | 0.475 | 0.94 | 0.705 | 0.97 | 0.716 | 1.02 | 0.454 | 0.088  |
| rs6029526  | LDL cholesterol | T/A | A | LDL cholesterol                 | 0.384 | 1.356  | 0.373 | 1.06 | 0.290 | 1.08 | 0.151 | 1.10 | 0.288 | 1.07 | 0.828 | -0.023 |
| rs6843082  | Stroke          | A/G | G | Self-reported history of stroke | 0.189 | 1.15   | 0.934 | 1.01 | 0.173 | 0.88 | 0.012 | 1.25 | 0.082 | 1.14 | 0.220 | 0.158  |
| rs556621   | Stroke          | C/A | A | Self-reported history of stroke | 0.906 | 0.99   | 0.843 | 0.99 | 0.756 | 0.98 | 0.011 | 1.21 | 0.358 | 1.06 | 0.063 | -0.207 |
| rs2107595  | Stroke          | C/T | T | Self-reported history of stroke | 0.647 | 1.05   | 0.521 | 0.94 | 0.220 | 0.88 | 0.609 | 0.95 | 0.162 | 0.89 | 0.820 | -0.034 |
| rs12425791 | Stroke          | G/A | A | Self-reported history of stroke | 0.220 | 0.88   | 0.755 | 0.97 | 0.160 | 0.88 | 0.780 | 1.02 | 0.755 | 1.02 | 0.287 | 0.146  |
| rs879324   | Stroke          | G/A | A | Self-reported history of stroke | 0.257 | 0.89   | 0.929 | 1.01 | 0.394 | 1.09 | 0.883 | 1.01 | 0.595 | 1.04 | 0.706 | 0.050  |
| rs10923931 | Type 2 Diabetes | G/T | T | Type 2 diabetes affected status | -     | -      | 0.819 | 0.98 | 0.375 | 1.12 | 0.190 | 1.16 | 0.302 | 1.10 | 0.873 | 0.027  |
| rs2075423  | Type 2 Diabetes | C/A | C | Type 2 diabetes affected status | -     | -      | 0.560 | 0.96 | 0.684 | 0.97 | 0.821 | 0.98 | 0.557 | 1.04 | 0.894 | -0.016 |
| rs7578597  | Type 2 Diabetes | A/G | A | Type 2 diabetes affected status | -     | -      | 0.925 | 0.99 | 0.333 | 0.87 | 0.017 | 0.73 | 0.001 | 0.68 | 0.155 | 0.274  |
| rs243021   | Type 2 Diabetes | G/A | A | Type 2 diabetes affected status | -     | -      | 0.705 | 0.98 | 0.418 | 1.06 | 0.720 | 0.98 | 0.884 | 1.01 | 0.269 | 0.113  |
| rs7593730  | Type 2 Diabetes | G/A | G | Type 2 diabetes affected status | -     | -      | 0.468 | 1.06 | 0.313 | 1.10 | 0.557 | 1.05 | 0.762 | 1.02 | 0.219 | -0.164 |
| rs13389219 | Type 2 Diabetes | G/A | G | Type 2 diabetes affected status | -     | -      | 0.614 | 1.03 | 1.000 | 1.00 | 0.433 | 1.06 | 0.620 | 0.97 | 0.131 | 0.161  |
| rs7578326  | Type 2 Diabetes | A/G | A | Type 2 diabetes affected status | -     | -      | 0.634 | 1.03 | 0.244 | 1.10 | 0.090 | 1.13 | 0.074 | 1.12 | 0.881 | -0.017 |
| rs1801282  | Type 2 Diabetes | C/G | C | Type 2 diabetes affected status | -     | -      | 0.172 | 1.15 | 0.555 | 1.07 | 0.177 | 0.86 | 0.666 | 0.96 | 0.382 | -0.142 |
| rs1496653  | Type 2 Diabetes | A/G | A | Type 2 diabetes affected status | -     | -      | 0.127 | 1.13 | 0.118 | 1.15 | 0.904 | 1.01 | 0.212 | 1.10 | 0.058 | 0.247  |
| rs4607103  | Type 2 Diabetes | C/T | C | Type 2 diabetes affected status | -     | -      | 0.712 | 0.97 | 0.828 | 1.02 | 0.432 | 1.06 | 0.303 | 1.07 | 0.401 | -0.101 |
| rs11708067 | Type 2 Diabetes | A/G | A | Type 2 diabetes affected status | -     | -      | 0.027 | 1.17 | 0.228 | 1.11 | 0.246 | 1.09 | 0.130 | 1.11 | 0.445 | -0.092 |
| rs4402960  | Type 2 Diabetes | G/T | T | Type 2 diabetes affected status | -     | -      | 0.353 | 1.07 | 0.603 | 0.96 | 0.064 | 1.14 | 0.057 | 1.13 | 0.083 | -0.198 |
| rs4689388  | Type 2 Diabetes | A/G | A | Type 2 diabetes affected status | -     | -      | 0.155 | 0.91 | 0.937 | 0.99 | 0.675 | 0.97 | 0.045 | 0.88 | 0.540 | -0.066 |
| rs459193   | Type 2 Diabetes | G/A | G | Type 2 diabetes affected status | -     | -      | 0.049 | 1.16 | 0.762 | 1.03 | 0.287 | 0.92 | 0.285 | 0.93 | 0.999 | 0.000  |
| rs4457053  | Type 2 Diabetes | A/G | G | Type 2 diabetes affected status | -     | -      | 0.415 | 0.95 | 0.218 | 1.11 | 0.875 | 1.01 | 0.962 | 1.00 | 0.338 | -0.108 |
| rs10440833 | Type 2 Diabetes | T/A | A | Type 2 diabetes affected status | -     | -      | 0.122 | 1.11 | 0.234 | 1.10 | 0.936 | 0.99 | 0.715 | 1.02 | 0.386 | -0.099 |
| rs17168486 | Type 2 Diabetes | C/T | T | Type 2 diabetes affected status | -     | -      | 0.469 | 1.06 | 0.647 | 1.04 | 0.383 | 1.08 | 0.871 | 0.99 | 0.952 | -0.008 |
| rs864745   | Type 2 Diabetes | C/T | T | Type 2 diabetes affected status | -     | -      | 0.948 | 1.00 | 0.920 | 1.01 | 0.989 | 1.00 | 0.638 | 1.03 | 0.495 | -0.073 |
| rs516946   | Type 2 Diabetes | G/A | G | Type 2 diabetes affected status | -     | -      | 0.478 | 0.95 | 0.796 | 1.02 | 0.903 | 0.99 | 0.130 | 1.12 | 0.348 | -0.120 |
| rs896854   | Type 2 Diabetes | G/A | A | Type 2 diabetes affected status | -     | -      | 0.287 | 0.93 | 0.037 | 0.86 | 0.077 | 0.89 | 0.016 | 0.87 | 0.042 | 0.215  |
| rs10811661 | Type 2 Diabetes | T/C | T | Type 2 diabetes affected status | -     | -      | 0.863 | 1.02 | 0.949 | 1.01 | 1.000 | 1.00 | 0.461 | 1.07 | 0.726 | 0.053  |
| rs7018475  | Type 2 Diabetes | T/G | T | Type 2 diabetes affected status | -     | -      | 0.529 | 0.95 | 0.134 | 0.87 | 0.271 | 0.92 | 0.694 | 0.97 | 0.755 | 0.040  |
| rs13292136 | Type 2 Diabetes | G/A | G | Type 2 diabetes affected status | -     | -      | 0.934 | 1.01 | 0.872 | 1.02 | 0.883 | 1.02 | 0.636 | 1.06 | 0.315 | 0.206  |
| rs2796441  | Type 2 Diabetes | G/A | G | Type 2 diabetes affected status | -     | -      | 0.629 | 1.03 | 0.983 | 1.00 | 0.064 | 0.88 | 0.068 | 0.89 | 0.732 | 0.037  |

|            |                   |     |   |                                 |       |        |       |      |       |      |       |      |       |      |       |        |
|------------|-------------------|-----|---|---------------------------------|-------|--------|-------|------|-------|------|-------|------|-------|------|-------|--------|
| rs12779790 | Type 2 Diabetes   | A/G | G | Type 2 diabetes affected status | -     | -      | 0.617 | 1.04 | 0.551 | 0.94 | 0.366 | 0.92 | 0.407 | 0.94 | 0.380 | 0.125  |
| rs12571751 | Type 2 Diabetes   | A/G | A | Type 2 diabetes affected status | -     | -      | 0.466 | 0.95 | 0.243 | 1.09 | 0.865 | 0.99 | 0.596 | 1.03 | 0.686 | -0.043 |
| rs5015480  | Type 2 Diabetes   | C/T | C | Type 2 diabetes affected status | -     | -      | 0.028 | 1.15 | 0.044 | 1.17 | 0.846 | 0.99 | 0.151 | 1.09 | 0.888 | 0.015  |
| rs7903146  | Type 2 Diabetes   | G/A | A | Type 2 diabetes affected status | -     | -      | 0.952 | 1.00 | 0.610 | 0.96 | 0.879 | 1.01 | 0.490 | 0.96 | 0.613 | 0.055  |
| rs231362   | Type 2 Diabetes   | C/T | C | Type 2 diabetes affected status | -     | -      | 0.140 | 0.91 | 0.788 | 0.98 | 0.086 | 0.89 | 0.446 | 0.96 | 0.708 | -0.039 |
| rs163184   | Type 2 Diabetes   | T/G | G | Type 2 diabetes affected status | -     | -      | 0.053 | 1.13 | 0.059 | 1.16 | 0.036 | 0.86 | 0.973 | 1.00 | 0.456 | 0.080  |
| rs5215     | Type 2 Diabetes   | T/C | C | Type 2 diabetes affected status | -     | -      | 0.756 | 1.02 | 0.362 | 0.93 | 0.348 | 0.94 | 0.363 | 0.95 | 0.572 | 0.060  |
| rs1552224  | Type 2 Diabetes   | A/C | A | Type 2 diabetes affected status | -     | -      | 0.644 | 0.96 | 0.592 | 1.06 | 0.115 | 1.17 | 0.200 | 1.12 | 0.778 | -0.044 |
| rs1387153  | Type 2 Diabetes   | G/A | A | Type 2 diabetes affected status | -     | -      | 0.135 | 1.11 | 0.001 | 1.32 | 0.286 | 1.08 | 0.212 | 1.09 | 0.927 | 0.011  |
| rs10842994 | Type 2 Diabetes   | C/T | C | Type 2 diabetes affected status | -     | -      | 0.466 | 1.06 | 0.803 | 1.03 | 0.968 | 1.00 | 0.142 | 0.89 | 0.193 | -0.184 |
| rs1531343  | Type 2 Diabetes   | G/C | C | Type 2 diabetes affected status | -     | -      | 0.621 | 0.95 | 0.562 | 1.08 | 0.307 | 0.89 | 0.091 | 0.84 | 0.406 | 0.149  |
| rs7961581  | Type 2 Diabetes   | T/C | C | Type 2 diabetes affected status | -     | -      | 0.288 | 0.93 | 0.312 | 1.08 | 0.399 | 1.06 | 0.981 | 1.00 | 0.501 | -0.074 |
| rs7957197  | Type 2 Diabetes   | T/A | T | Type 2 diabetes affected status | -     | -      | 0.044 | 0.84 | 0.210 | 0.88 | 0.135 | 0.87 | 0.523 | 0.95 | 0.033 | 0.292  |
| rs1359790  | Type 2 Diabetes   | G/A | G | Type 2 diabetes affected status | -     | -      | 0.349 | 1.07 | 0.412 | 1.07 | 0.130 | 1.12 | 0.152 | 1.10 | 0.322 | -0.113 |
| rs7177055  | Type 2 Diabetes   | A/G | A | Type 2 diabetes affected status | -     | -      | 0.584 | 0.96 | 0.658 | 0.96 | 0.335 | 0.93 | 0.504 | 0.96 | 0.607 | 0.062  |
| rs11634397 | Type 2 Diabetes   | G/A | G | Type 2 diabetes affected status | -     | -      | 0.227 | 0.92 | 0.016 | 0.83 | 0.431 | 0.95 | 0.887 | 1.01 | 0.730 | 0.037  |
| rs8042680  | Type 2 Diabetes   | C/A | A | Type 2 diabetes affected status | -     | -      | 0.897 | 0.99 | 0.951 | 1.01 | 0.407 | 0.94 | 0.882 | 1.01 | 0.549 | 0.071  |
| rs8050136  | Type 2 Diabetes   | C/A | A | Type 2 diabetes affected status | -     | -      | 0.997 | 1.00 | 0.704 | 1.03 | 0.829 | 0.99 | 0.516 | 0.96 | 0.516 | 0.067  |
| rs7202877  | Type 2 Diabetes   | T/G | T | Type 2 diabetes affected status | -     | -      | 0.792 | 0.97 | 0.780 | 0.96 | 0.799 | 0.97 | 0.270 | 0.88 | 0.596 | 0.107  |
| rs8090011  | Type 2 Diabetes   | C/G | G | Type 2 diabetes affected status | -     | -      | 0.602 | 1.04 | 0.901 | 1.01 | 0.283 | 1.08 | 0.909 | 1.01 | 0.754 | 0.035  |
| rs12970134 | Type 2 Diabetes   | G/A | A | Type 2 diabetes affected status | -     | -      | 0.483 | 0.95 | 0.499 | 1.06 | 0.348 | 1.07 | 0.309 | 1.07 | 0.391 | -0.099 |
| rs10401969 | Type 2 Diabetes   | A/G | G | Type 2 diabetes affected status | -     | -      | 0.414 | 0.92 | 0.808 | 1.03 | 0.562 | 0.94 | 0.928 | 1.01 | 0.680 | -0.068 |
| rs5945326  | Type 2 Diabetes   | A/G | A | Type 2 diabetes affected status | -     | -      | 0.904 | 0.99 | 0.943 | 1.01 | 0.541 | 1.04 | 0.571 | 1.04 | 0.484 | -0.077 |
| rs10903129 | Total Cholesterol | G/A | G | Total Cholesterol               | 0.528 | -0.007 | 0.652 | 0.97 | 0.322 | 1.08 | 0.687 | 0.97 | 0.540 | 0.96 | 0.096 | 0.179  |
| rs2479409  | Total Cholesterol | A/G | G | Total Cholesterol               | 0.015 | 0.027  | 0.718 | 0.98 | 0.266 | 0.92 | 0.323 | 1.07 | 0.561 | 1.04 | 0.873 | 0.017  |
| rs10889353 | Total Cholesterol | A/C | A | Total Cholesterol               | 0.006 | 0.031  | 0.619 | 1.03 | 0.978 | 1.00 | 0.812 | 0.98 | 0.449 | 0.95 | 0.225 | 0.134  |
| rs7515577  | Total Cholesterol | A/C | A | Total Cholesterol               | 0.260 | 0.015  | 0.983 | 1.00 | 0.841 | 0.98 | 0.484 | 0.94 | 0.410 | 0.94 | 0.281 | -0.137 |
| rs646776   | Total Cholesterol | A/G | A | Total Cholesterol               | 0.332 | 0.012  | 0.494 | 1.05 | 0.239 | 1.11 | 0.555 | 0.95 | 0.438 | 0.95 | 0.047 | 0.251  |
| rs2642442  | Total Cholesterol | T/C | C | Total Cholesterol               | 0.444 | -0.009 | 0.739 | 0.98 | 0.535 | 1.05 | 0.049 | 1.16 | 0.523 | 1.04 | 0.335 | 0.110  |
| rs514230   | Total Cholesterol | A/T | A | Total Cholesterol               | 0.399 | 0.009  | 0.534 | 0.96 | 0.719 | 1.03 | 0.276 | 0.93 | 0.692 | 0.98 | 0.648 | -0.048 |
| rs693      | Total Cholesterol | G/A | A | Total Cholesterol               | 0.083 | 0.018  | 0.907 | 1.01 | 0.512 | 1.05 | 0.714 | 0.98 | 0.129 | 0.91 | 0.346 | 0.098  |
| rs1260326  | Total Cholesterol | G/A | A | Total Cholesterol               | 0.142 | 0.016  | 0.672 | 0.97 | 0.423 | 1.06 | 0.101 | 1.12 | 0.605 | 1.03 | 0.514 | 0.069  |
| rs6756629  | Total Cholesterol | G/A | G | Total Cholesterol               | 0.840 | 0.004  | 0.476 | 1.09 | 0.427 | 0.89 | 0.348 | 0.88 | 0.295 | 0.88 | 0.789 | -0.055 |
| rs7570971  | Total Cholesterol | C/A | A | Total Cholesterol               | 0.096 | 0.019  | 0.268 | 1.08 | 0.897 | 0.99 | 0.347 | 0.93 | 0.497 | 0.96 | 0.480 | 0.080  |

|            |                   |     |   |                   |       |        |       |      |       |      |       |      |       |      |       |        |
|------------|-------------------|-----|---|-------------------|-------|--------|-------|------|-------|------|-------|------|-------|------|-------|--------|
| rs2290159  | Total Cholesterol | G/C | G | Total Cholesterol | 0.189 | -0.017 | 0.344 | 1.08 | 0.810 | 1.02 | 0.501 | 1.06 | 0.375 | 1.07 | 0.018 | -0.305 |
| rs3846662  | Total Cholesterol | A/G | G | Total Cholesterol | 0.015 | 0.027  | 0.979 | 1.00 | 0.748 | 0.98 | 0.417 | 1.06 | 0.981 | 1.00 | 0.689 | 0.044  |
| rs6882076  | Total Cholesterol | G/A | G | Total Cholesterol | 0.413 | -0.009 | 0.112 | 1.11 | 0.188 | 1.11 | 0.505 | 0.95 | 0.120 | 0.91 | 0.163 | 0.155  |
| rs3757354  | Total Cholesterol | G/A | G | Total Cholesterol | 0.948 | -0.001 | 0.131 | 1.13 | 0.647 | 1.04 | 0.714 | 0.97 | 0.733 | 0.97 | 0.865 | -0.022 |
| rs1800562  | Total Cholesterol | G/A | G | Total Cholesterol | 0.600 | 0.011  | 0.871 | 1.02 | 0.023 | 1.34 | 0.955 | 1.01 | 0.634 | 0.95 | 0.401 | -0.164 |
| rs3177928  | Total Cholesterol | G/A | A | Total Cholesterol | 0.897 | 0.002  | 0.696 | 0.97 | 0.505 | 1.07 | 0.678 | 0.96 | 0.507 | 0.94 | 0.148 | -0.217 |
| rs2814982  | Total Cholesterol | G/A | G | Total Cholesterol | 0.432 | -0.014 | 0.764 | 0.97 | 0.479 | 0.92 | 0.406 | 1.09 | 0.115 | 1.17 | 0.461 | -0.128 |
| rs1564348  | Total Cholesterol | A/G | G | Total Cholesterol | 0.253 | 0.017  | 0.772 | 0.98 | 0.569 | 1.06 | 0.754 | 0.97 | 0.842 | 0.98 | 0.707 | 0.054  |
| rs12670798 | Total Cholesterol | A/G | G | Total Cholesterol | 0.551 | -0.008 | 0.742 | 0.98 | 0.815 | 1.02 | 0.882 | 0.99 | 0.517 | 1.05 | 0.324 | 0.122  |
| rs2072183  | Total Cholesterol | C/G | G | Total Cholesterol | 0.831 | -0.003 | 0.529 | 0.95 | 0.110 | 0.87 | 0.806 | 0.98 | 0.674 | 0.97 | 0.541 | 0.076  |
| rs9987289  | Total Cholesterol | G/A | G | Total Cholesterol | 0.180 | -0.023 | 0.700 | 1.04 | 0.792 | 0.97 | 0.436 | 1.09 | 0.235 | 1.12 | 0.750 | 0.055  |
| rs1495741  | Total Cholesterol | A/G | G | Total Cholesterol | 0.253 | 0.015  | 0.948 | 0.99 | 0.112 | 0.87 | 0.956 | 1.00 | 0.633 | 0.97 | 0.260 | 0.144  |
| rs2081687  | Total Cholesterol | G/A | A | Total Cholesterol | 0.023 | 0.025  | 0.407 | 0.95 | 0.757 | 1.02 | 0.295 | 0.93 | 0.149 | 0.91 | 0.576 | 0.061  |
| rs2737229  | Total Cholesterol | A/C | A | Total Cholesterol | 0.041 | 0.024  | 0.892 | 0.99 | 0.914 | 0.99 | 0.459 | 1.06 | 0.256 | 1.08 | 0.079 | 0.200  |
| rs2954029  | Total Cholesterol | A/T | A | Total Cholesterol | 0.868 | -0.002 | 0.010 | 1.18 | 0.172 | 1.11 | 0.105 | 0.89 | 0.193 | 0.92 | 0.832 | 0.023  |
| rs11136341 | Total Cholesterol | A/G | G | Total Cholesterol | 0.059 | -0.020 | 0.620 | 0.97 | 0.216 | 0.91 | 0.911 | 1.01 | 0.868 | 0.99 | 0.644 | 0.049  |
| rs1883025  | Total Cholesterol | G/A | G | Total Cholesterol | 0.072 | 0.022  | 0.162 | 0.90 | 0.549 | 0.95 | 0.172 | 0.90 | 0.300 | 1.07 | 0.181 | 0.159  |
| rs635634   | Total Cholesterol | G/A | A | Total Cholesterol | 0.206 | 0.018  | 0.577 | 0.95 | 0.202 | 0.88 | 0.154 | 0.88 | 0.670 | 0.97 | 0.388 | 0.120  |
| rs2255141  | Total Cholesterol | G/A | A | Total Cholesterol | 0.923 | -0.001 | 0.726 | 0.98 | 0.878 | 1.01 | 0.995 | 1.00 | 0.667 | 1.03 | 0.196 | -0.151 |
| rs10128711 | Total Cholesterol | G/A | G | Total Cholesterol | 0.595 | 0.006  | 0.376 | 1.07 | 0.798 | 0.98 | 0.237 | 0.91 | 0.891 | 1.01 | 0.469 | -0.087 |
| rs174570   | Total Cholesterol | G/A | G | Total Cholesterol | 0.651 | 0.007  | 0.290 | 1.10 | 0.511 | 1.07 | 0.218 | 1.13 | 0.880 | 1.01 | 0.470 | -0.110 |
| rs964184   | Total Cholesterol | G/C | C | Total Cholesterol | 0.907 | 0.002  | 0.747 | 0.97 | 0.375 | 0.91 | 0.799 | 1.02 | 0.503 | 1.06 | 0.835 | 0.031  |
| rs7941030  | Total Cholesterol | A/G | G | Total Cholesterol | 0.381 | -0.010 | 0.458 | 0.95 | 0.900 | 1.01 | 0.915 | 1.01 | 0.386 | 0.95 | 0.426 | 0.087  |
| rs11220462 | Total Cholesterol | G/A | A | Total Cholesterol | 0.685 | 0.006  | 0.707 | 0.97 | 0.624 | 0.95 | 0.731 | 1.03 | 0.363 | 0.92 | 0.914 | -0.016 |
| rs11065987 | Total Cholesterol | A/G | A | Total Cholesterol | 0.140 | 0.015  | 0.447 | 0.95 | 0.705 | 1.03 | 0.056 | 1.13 | 0.086 | 1.11 | 0.085 | 0.179  |
| rs3764261  | Total Cholesterol | C/A | A | Total Cholesterol | 0.962 | 0.001  | 0.605 | 1.04 | 0.456 | 1.06 | 0.073 | 1.14 | 0.168 | 1.09 | 0.046 | -0.222 |
| rs2000999  | Total Cholesterol | G/A | A | Total Cholesterol | 0.254 | -0.015 | 0.183 | 1.11 | 0.023 | 1.25 | 0.049 | 0.85 | 0.119 | 0.89 | 0.566 | -0.075 |
| rs7206971  | Total Cholesterol | G/A | A | Total Cholesterol | 0.856 | 0.002  | 0.030 | 1.15 | 0.033 | 1.18 | 0.798 | 0.98 | 0.296 | 0.94 | 0.144 | 0.156  |
| rs2228671  | Total Cholesterol | G/A | G | Total Cholesterol | 0.504 | 0.010  | 0.162 | 0.88 | 0.714 | 0.96 | 0.650 | 0.96 | 0.954 | 1.00 | 0.913 | 0.016  |
| rs2304130  | Total Cholesterol | A/G | A | Total Cholesterol | 0.032 | 0.037  | 0.347 | 1.10 | 0.973 | 1.00 | 0.759 | 0.97 | 0.216 | 0.89 | 0.420 | 0.138  |
| rs2075650  | Total Cholesterol | A/G | G | Total Cholesterol | 0.106 | 0.026  | 0.836 | 0.98 | 0.267 | 1.14 | 0.123 | 1.18 | 0.315 | 1.10 | 0.570 | -0.091 |
| rs492602   | Total Cholesterol | A/G | G | Total Cholesterol | 0.166 | -0.015 | 0.412 | 1.05 | 0.034 | 1.17 | 0.228 | 1.08 | 0.045 | 1.13 | 0.753 | 0.033  |
| rs2902940  | Total Cholesterol | A/G | A | Total Cholesterol | 0.498 | -0.008 | 0.268 | 1.08 | 0.224 | 1.10 | 0.799 | 0.98 | 0.240 | 0.93 | 0.462 | -0.081 |
| rs6029526  | Total Cholesterol | T/A | A | Total Cholesterol | 0.383 | 0.009  | 0.373 | 1.06 | 0.290 | 1.08 | 0.151 | 1.10 | 0.288 | 1.07 | 0.828 | -0.023 |

|            |                   |     |   |                   |        |         |       |      |       |      |       |      |       |      |       |        |
|------------|-------------------|-----|---|-------------------|--------|---------|-------|------|-------|------|-------|------|-------|------|-------|--------|
| rs1800961  | Total Cholesterol | G/A | G | Total Cholesterol | 0.820  | 0.007   | 0.896 | 1.02 | 0.186 | 1.31 | 0.423 | 0.85 | 0.170 | 0.78 | 0.186 | 0.399  |
| rs2131925  | Triglycerides     | A/C | A | Triglycerides     | 0.648  | -0.013  | 0.685 | 1.03 | 0.859 | 0.99 | 0.927 | 0.99 | 0.449 | 0.95 | 0.254 | 0.127  |
| rs4846914  | Triglycerides     | A/G | G | Triglycerides     | 0.035  | 0.058   | 0.619 | 1.03 | 0.799 | 0.98 | 0.539 | 0.96 | 0.891 | 1.01 | 0.070 | 0.198  |
| rs6754295  | Triglycerides     | A/C | A | Triglycerides     | 0.543  | 0.018   | 0.181 | 0.91 | 0.409 | 0.93 | 0.980 | 1.00 | 0.380 | 0.94 | 0.725 | 0.042  |
| rs1260326  | Triglycerides     | G/A | A | Triglycerides     | 0.0002 | 0.097   | 0.672 | 0.97 | 0.423 | 1.06 | 0.101 | 1.12 | 0.605 | 1.03 | 0.514 | 0.069  |
| rs10195252 | Triglycerides     | A/G | A | Triglycerides     | 0.054  | 0.051   | 0.417 | 1.05 | 0.808 | 0.98 | 0.528 | 1.04 | 0.670 | 0.97 | 0.093 | 0.177  |
| rs2972146  | Triglycerides     | A/C | A | Triglycerides     | 0.123  | -0.043  | 0.871 | 0.99 | 0.314 | 1.08 | 0.099 | 1.12 | 0.031 | 1.15 | 0.733 | -0.038 |
| rs645040   | Triglycerides     | A/C | A | Triglycerides     | 0.423  | -0.025  | 0.226 | 0.91 | 0.959 | 1.00 | 0.518 | 0.95 | 0.641 | 0.97 | 0.403 | 0.105  |
| rs442177   | Triglycerides     | A/C | A | Triglycerides     | 0.091  | 0.045   | 0.336 | 1.06 | 0.255 | 1.09 | 0.517 | 0.96 | 0.270 | 1.07 | 0.729 | 0.037  |
| rs9686661  | Triglycerides     | G/A | A | Triglycerides     | 0.511  | 0.021   | 0.490 | 1.05 | 0.372 | 0.93 | 0.760 | 0.98 | 0.775 | 1.02 | 0.200 | 0.160  |
| rs6882076  | Triglycerides     | G/A | A | Triglycerides     | 0.257  | 0.032   | 0.112 | 0.90 | 0.188 | 0.90 | 0.505 | 1.05 | 0.120 | 1.10 | 0.163 | -0.155 |
| rs2247056  | Triglycerides     | G/A | G | Triglycerides     | 0.751  | -0.010  | 0.170 | 1.10 | 0.814 | 1.02 | 0.458 | 0.94 | 0.273 | 1.08 | 0.766 | 0.036  |
| rs17145738 | Triglycerides     | C/T | C | Triglycerides     | 0.181  | 0.053   | 0.728 | 0.97 | 0.242 | 0.87 | 0.336 | 0.91 | 0.633 | 1.04 | 0.911 | 0.017  |
| rs7819412  | Triglycerides     | G/A | A | Triglycerides     | 0.955  | 0.001   | 0.988 | 1.00 | 0.299 | 1.08 | 0.332 | 1.07 | 0.760 | 1.02 | 0.348 | -0.098 |
| rs1495741  | Triglycerides     | A/G | G | Triglycerides     | 0.605  | -0.017  | 0.948 | 0.99 | 0.112 | 0.87 | 0.956 | 1.00 | 0.633 | 0.97 | 0.260 | 0.144  |
| rs12678919 | Triglycerides     | A/G | A | Triglycerides     | 0.078  | 0.082   | 0.987 | 1.00 | 0.830 | 1.03 | 0.774 | 0.97 | 0.669 | 1.05 | 0.039 | 0.378  |
| rs17321515 | Triglycerides     | A/G | A | Triglycerides     | 0.160  | 0.037   | 0.035 | 1.14 | 0.396 | 1.06 | 0.173 | 0.91 | 0.152 | 0.92 | 0.737 | 0.035  |
| rs10761731 | Triglycerides     | A/T | A | Triglycerides     | 0.529  | 0.017   | 0.367 | 1.06 | 0.518 | 1.05 | 0.005 | 1.21 | 0.012 | 1.16 | 0.158 | -0.148 |
| rs2068888  | Triglycerides     | G/A | G | Triglycerides     | 0.029  | 0.057   | 0.382 | 0.95 | 0.786 | 0.98 | 0.998 | 1.00 | 0.665 | 1.03 | 0.077 | 0.186  |
| rs174546   | Triglycerides     | G/A | A | Triglycerides     | 0.150  | 0.040   | 0.316 | 0.93 | 0.712 | 0.97 | 0.306 | 0.93 | 0.717 | 1.02 | 0.771 | -0.033 |
| rs12286037 | Triglycerides     | C/T | T | Triglycerides     | 0.002  | 0.155   | 0.198 | 0.86 | 0.065 | 0.79 | 0.175 | 0.85 | 0.254 | 0.88 | 0.349 | 0.183  |
| rs2075292  | Triglycerides     | A/C | C | Triglycerides     | 0.008  | 0.108   | 0.198 | 1.14 | 0.460 | 1.09 | 0.654 | 1.05 | 0.356 | 1.09 | 0.552 | -0.096 |
| rs11613352 | Triglycerides     | C/T | C | Triglycerides     | 0.645  | 0.014   | 0.220 | 1.09 | 0.257 | 1.10 | 0.141 | 1.12 | 0.647 | 0.97 | 0.476 | 0.085  |
| rs4765127  | Triglycerides     | C/A | C | Triglycerides     | 0.576  | 0.015   | 0.157 | 0.91 | 0.307 | 0.92 | 0.111 | 0.89 | 0.695 | 0.98 | 0.120 | 0.170  |
| rs2412710  | Triglycerides     | G/A | A | Triglycerides     | 0.997  | -0.0005 | 0.804 | 1.06 | 0.908 | 0.97 | 0.164 | 1.43 | 0.562 | 1.13 | 0.609 | 0.194  |
| rs2929282  | Triglycerides     | A/T | T | Triglycerides     | 0.131  | -0.090  | 0.309 | 1.16 | 0.224 | 1.24 | 0.528 | 1.10 | 0.873 | 1.02 | 0.103 | 0.387  |
| rs1532085  | Triglycerides     | G/A | G | Triglycerides     | 0.128  | 0.042   | 0.525 | 1.04 | 0.900 | 0.99 | 0.348 | 0.94 | 0.595 | 0.97 | 0.490 | -0.076 |
| rs11649653 | Triglycerides     | C/G | C | Triglycerides     | 0.099  | -0.044  | 0.369 | 1.06 | 0.170 | 1.11 | 0.706 | 0.97 | 0.285 | 1.07 | 0.778 | -0.030 |
| rs3764261  | Triglycerides     | C/A | C | Triglycerides     | 0.961  | 0.001   | 0.605 | 0.97 | 0.456 | 0.94 | 0.073 | 0.88 | 0.168 | 0.92 | 0.046 | 0.222  |
| rs10401969 | Triglycerides     | A/G | A | Triglycerides     | 0.002  | 0.127   | 0.414 | 1.09 | 0.808 | 0.97 | 0.562 | 1.06 | 0.928 | 0.99 | 0.680 | 0.068  |
| rs439401   | Triglycerides     | G/A | G | Triglycerides     | 0.079  | 0.048   | 0.949 | 1.00 | 0.400 | 1.07 | 0.818 | 1.02 | 0.416 | 1.05 | 0.151 | -0.161 |
| rs7679     | Triglycerides     | T/C | C | Triglycerides     | 0.185  | 0.043   | 0.234 | 0.91 | 0.706 | 0.97 | 0.890 | 0.99 | 0.847 | 1.01 | 0.126 | 0.195  |
| rs5756931  | Triglycerides     | A/G | A | Triglycerides     | 0.913  | -0.003  | 0.879 | 1.01 | 0.624 | 0.96 | 0.756 | 1.02 | 0.628 | 0.97 | 0.269 | 0.118  |
