# Supplementary material
Source: PubMed Central journal article supplement (PMC4506855)
Supplement: NIHMS666397-supplement-592_2015_720_MOESM3_ESM.pdf [file NIHMS666397-supplement-592_2015_720_MOESM3_ESM.pdf]

Supplementary Table 3: Association results for individual trait genetic risk scores. Relationships between the risk scores and the traits were examined using marginal models with generalized estimating equations. Models were adjusted for age and sex. Associations are reported for a one unit increase in genetic risk score. Abbreviations: CAC, coronary artery calcification; CAD, coronary artery disease; CI, confidence interval; CRP, C-reactive protein; eGFR, estimated glomerular filtration rate; MI, myocardial infarction.

| Risk Score               | All-Cause Mortality |        |      |         | CVD Mortality |        |      |         | Self-reported History of MI |        |      |         | Self-reported History of CVD |        |      |         | Coronary Artery Calcification |        |       |         |
|--------------------------|---------------------|--------|------|---------|---------------|--------|------|---------|-----------------------------|--------|------|---------|------------------------------|--------|------|---------|-------------------------------|--------|-------|---------|
|                          | Hazard Ratio        | 95% CI |      | p-value | Hazard Ratio  | 95% CI |      | p-value | Odds Ratio                  | 95% CI |      | p-value | Odds Ratio                   | 95% CI |      | p-value | Beta Estimate                 | 95% CI |       | p-value |
| Blood pressure traits    | 1.01                | 0.97   | 1.05 | 0.523   | 1.00          | 0.95   | 1.05 | 0.983   | 0.99                        | 0.94   | 1.04 | 0.703   | 0.99                         | 0.94   | 1.03 | 0.572   | -0.035                        | -0.086 | 0.017 | 0.189   |
| BMI                      | 1.01                | 0.97   | 1.05 | 0.585   | 1.00          | 0.95   | 1.06 | 0.923   | 1.04                        | 0.99   | 1.09 | 0.137   | 1.02                         | 0.98   | 1.06 | 0.299   | 0.018                         | -0.028 | 0.064 | 0.435   |
| CAC                      | 1.04                | 0.93   | 1.17 | 0.502   | 1.04          | 0.89   | 1.23 | 0.595   | 1.10                        | 0.94   | 1.29 | 0.244   | 1.16                         | 1.02   | 1.33 | 0.028   | 0.178                         | 0.034  | 0.321 | 0.015   |
| CAD                      | 1.03                | 1.00   | 1.07 | 0.065   | 1.07          | 1.01   | 1.13 | 0.020   | 1.10                        | 1.05   | 1.16 | 0.0002  | 1.03                         | 0.98   | 1.08 | 0.216   | 0.087                         | 0.043  | 0.131 | 0.0001  |
| CRP                      | 1.05                | 0.99   | 1.10 | 0.082   | 1.00          | 0.93   | 1.08 | 0.994   | 1.00                        | 0.94   | 1.07 | 0.895   | 1.00                         | 0.95   | 1.06 | 0.876   | 0.017                         | -0.045 | 0.079 | 0.590   |
| Electrocardiogram traits | 1.02                | 0.98   | 1.06 | 0.322   | 1.05          | 0.99   | 1.10 | 0.097   | 1.00                        | 0.95   | 1.05 | 0.926   | 0.99                         | 0.94   | 1.03 | 0.518   | 0.036                         | -0.009 | 0.081 | 0.118   |
| Fasting glucose          | 0.98                | 0.94   | 1.02 | 0.390   | 0.98          | 0.92   | 1.05 | 0.586   | 1.00                        | 0.93   | 1.06 | 0.892   | 1.00                         | 0.95   | 1.06 | 0.932   | -0.006                        | -0.064 | 0.051 | 0.826   |
| eGFR                     | 1.00                | 0.96   | 1.03 | 0.756   | 0.99          | 0.95   | 1.04 | 0.815   | 1.05                        | 1.00   | 1.11 | 0.043   | 1.02                         | 0.97   | 1.06 | 0.455   | 0.008                         | -0.040 | 0.057 | 0.733   |
| HDL cholesterol          | 0.99                | 0.96   | 1.02 | 0.399   | 0.99          | 0.95   | 1.04 | 0.709   | 0.99                        | 0.95   | 1.04 | 0.775   | 1.00                         | 0.97   | 1.04 | 0.787   | 0.029                         | -0.008 | 0.066 | 0.120   |
| LDL cholesterol          | 1.00                | 0.97   | 1.02 | 0.695   | 1.00          | 0.96   | 1.04 | 1.000   | 1.01                        | 0.97   | 1.04 | 0.750   | 1.01                         | 0.98   | 1.05 | 0.432   | 0.034                         | -0.002 | 0.071 | 0.064   |
| Stroke                   | 1.04                | 0.94   | 1.16 | 0.436   | 1.13          | 0.99   | 1.30 | 0.074   | 0.85                        | 0.74   | 0.97 | 0.021   | 0.94                         | 0.84   | 1.05 | 0.284   | 0.009                         | -0.105 | 0.123 | 0.875   |
| Type 2 Diabetes          | 0.98                | 0.96   | 1.01 | 0.137   | 0.95          | 0.92   | 0.99 | 0.008   | 1.01                        | 0.97   | 1.05 | 0.541   | 1.00                         | 0.96   | 1.03 | 0.877   | 0.006                         | -0.029 | 0.041 | 0.728   |
| Total Cholesterol        | 0.99                | 0.96   | 1.02 | 0.465   | 0.97          | 0.93   | 1.01 | 0.102   | 1.00                        | 0.96   | 1.04 | 0.868   | 1.01                         | 0.98   | 1.04 | 0.517   | 0.034                         | -0.002 | 0.070 | 0.062   |
| Triglycerides            | 1.00                | 0.96   | 1.03 | 0.828   | 1.00          | 0.95   | 1.05 | 0.966   | 1.00                        | 0.95   | 1.05 | 0.971   | 0.98                         | 0.94   | 1.02 | 0.237   | 0.059                         | 0.016  | 0.102 | 0.007   |
