# Supplementary material
Source: PubMed Central journal article supplement (PMC4506855)
Supplement: NIHMS666397-supplement-592_2015_720_MOESM4_ESM.pdf [file NIHMS666397-supplement-592_2015_720_MOESM4_ESM.pdf]

Supplementary Table 4: Association results for all individual trait genetic risk scores analyzed in a single model, with additional adjustment for age and sex. Relationships were examined using marginal models with generalized estimating equations. Associations are reported for a one unit increase in each genetic risk score, adjusting for covariates and all other individual genetic risk scores. Abbreviations: CAC, coronary artery calcification; CAD, coronary artery disease; CI, confidence interval; CRP, C-reactive protein; eGFR, estimated glomerular filtration rate; MI, myocardial infarction.

| Risk Score               | All-Cause Mortality |        |      |         | CVD Mortality |        |      |         | Self-reported History of MI |        |      | Self-reported History of CVD |            |        | Coronary Artery Calcification |         |               |        |       |         |
|--------------------------|---------------------|--------|------|---------|---------------|--------|------|---------|-----------------------------|--------|------|------------------------------|------------|--------|-------------------------------|---------|---------------|--------|-------|---------|
|                          | Hazard Ratio        | 95% CI |      | p-value | Hazard Ratio  | 95% CI |      | p-value | Odds Ratio                  | 95% CI |      | p-value                      | Odds Ratio | 95% CI |                               | p-value | Beta Estimate | 95% CI |       | p-value |
| Blood pressure traits    | 1.01                | 0.97   | 1.05 | 0.678   | 0.99          | 0.94   | 1.05 | 0.745   | 0.98                        | 0.92   | 1.04 | 0.451                        | 0.99       | 0.94   | 1.03                          | 0.607   | -0.039        | -0.089 | 0.012 | 0.132   |
| BMI                      | 1.01                | 0.97   | 1.05 | 0.628   | 1.00          | 0.94   | 1.06 | 0.991   | 1.04                        | 0.99   | 1.09 | 0.133                        | 1.02       | 0.98   | 1.06                          | 0.265   | 0.011         | -0.035 | 0.056 | 0.649   |
| CAC                      | 1.03                | 0.91   | 1.16 | 0.699   | 1.01          | 0.85   | 1.19 | 0.943   | 1.06                        | 0.90   | 1.25 | 0.479                        | 1.16       | 1.01   | 1.33                          | 0.038   | 0.130         | -0.012 | 0.272 | 0.074   |
| CAD                      | 1.04                | 1.00   | 1.08 | 0.046   | 1.08          | 1.02   | 1.15 | 0.011   | 1.10                        | 1.05   | 1.16 | 0.0003                       | 1.02       | 0.97   | 1.07                          | 0.400   | 0.077         | 0.032  | 0.122 | 0.001   |
| CRP                      | 1.05                | 0.99   | 1.10 | 0.087   | 1.00          | 0.93   | 1.09 | 0.922   | 1.00                        | 0.93   | 1.07 | 0.974                        | 1.00       | 0.95   | 1.06                          | 0.894   | 0.024         | -0.037 | 0.084 | 0.448   |
| Electrocardiogram traits | 1.03                | 0.99   | 1.07 | 0.193   | 1.06          | 1.00   | 1.12 | 0.036   | 1.01                        | 0.95   | 1.06 | 0.826                        | 0.99       | 0.94   | 1.03                          | 0.547   | 0.046         | 0.002  | 0.091 | 0.042   |
| Fasting glucose          | 0.99                | 0.95   | 1.04 | 0.678   | 0.99          | 0.93   | 1.06 | 0.855   | 0.98                        | 0.91   | 1.05 | 0.564                        | 1.00       | 0.94   | 1.05                          | 0.860   | -0.002        | -0.059 | 0.055 | 0.952   |
| eGFR                     | 1.00                | 0.96   | 1.03 | 0.832   | 1.00          | 0.95   | 1.05 | 0.863   | 1.05                        | 1.00   | 1.11 | 0.045                        | 1.02       | 0.98   | 1.07                          | 0.355   | 0.018         | -0.031 | 0.068 | 0.466   |
| HDL cholesterol          | 0.98                | 0.95   | 1.02 | 0.281   | 0.98          | 0.93   | 1.03 | 0.378   | 0.99                        | 0.94   | 1.04 | 0.613                        | 1.01       | 0.98   | 1.05                          | 0.484   | 0.010         | -0.030 | 0.049 | 0.640   |
| LDL cholesterol          | 1.00                | 0.97   | 1.04 | 0.820   | 1.03          | 0.98   | 1.09 | 0.284   | 1.01                        | 0.96   | 1.07 | 0.724                        | 1.01       | 0.96   | 1.06                          | 0.683   | 0.015         | -0.030 | 0.060 | 0.512   |
| Stroke                   | 1.05                | 0.95   | 1.16 | 0.376   | 1.15          | 1.00   | 1.32 | 0.050   | 0.83                        | 0.72   | 0.96 | 0.012                        | 0.93       | 0.83   | 1.04                          | 0.225   | 0.001         | -0.110 | 0.111 | 0.992   |
| Type 2 Diabetes          | 0.98                | 0.95   | 1.01 | 0.125   | 0.95          | 0.91   | 0.98 | 0.004   | 1.01                        | 0.97   | 1.05 | 0.679                        | 1.00       | 0.96   | 1.03                          | 0.864   | -0.003        | -0.039 | 0.032 | 0.863   |
| Total Cholesterol        | 0.98                | 0.95   | 1.02 | 0.400   | 0.94          | 0.89   | 0.99 | 0.030   | 0.99                        | 0.94   | 1.04 | 0.672                        | 1.01       | 0.96   | 1.05                          | 0.748   | 0.019         | -0.026 | 0.063 | 0.408   |
| Triglycerides            | 1.00                | 0.97   | 1.04 | 0.861   | 1.01          | 0.96   | 1.07 | 0.605   | 1.00                        | 0.95   | 1.05 | 0.963                        | 0.97       | 0.93   | 1.01                          | 0.124   | 0.050         | 0.002  | 0.097 | 0.040   |
